# Supplementary material for: Aromatic C–H silylation of arenes with 1-hydrosilatrane catalyzed by an iridium(i)/2,9-dimethylphenanthroline (dmphen) complex
Source: Royal Society of Chemistry journal article supplement (doi:10.1039/c3ob41623b), 2013-01-01

# Aromatic C–H silylation of arenes with 1-hydrosilatrane catalyzed by an iridium(I)/2,9-dimethylphenanthroline (dmphen) complex

Tatsuo Ishiyama, Takeaki Saiki, Emi Kishida, Ikuo Sasaki, Hajime Ito, and Norio Miyaura

Division of Chemical Process Engineering, Graduate School of Engineering,  
Hokkaido University, Sapporo, 060-8628, Japan.

Fax: +81 11 706 6562; Tel: +81 11 706 6562; E-mail: ishiyama@eng.hokudai.ac.jp.

**General.** All the experiments were carried out under a nitrogen atmosphere.  $^1\text{H}$  and  $^{13}\text{C}$  NMR spectra were recorded in  $\text{CDCl}_3$  solutions using a JEOL JNM-A400II spectrometer (400 or 100 MHz) and  $\text{Me}_4\text{Si}$  or residual protiated solvent as an internal standard. Low- and high-resolution mass spectra were obtained on a JEOL JMS-DX303. GC analyses were conducted on a Hitachi G-3500 instrument equipped with a glass column (OV-101 on Uniport B, 2 m).  $[\text{Ir}(\text{OMe})(\text{cod})]_2$ ,<sup>1</sup> 2,9-diisopropyl-1,10-phenanthroline,<sup>2</sup> 2,9-di-*tert*-butyl-1,10-phenanthroline,<sup>2</sup> 1-hydro-2,8,9-trioxa-5-aza-1-silabicyclo[3.3.3]undecane,<sup>3</sup> and 2,9-dimethyl-4,7-dichloro-1,10-phenanthroline<sup>4</sup> were synthesized by the reported procedure. 2,9-Dimethyl-4,7-bis(dimethylamino)-1,10-phenanthroline and 2,9-dimethyl-4,7-dimethoxy-1,10-phenanthroline were prepared by the methods similar to those for 4,7-bis(dimethylamino)-1,10-phenanthroline<sup>5</sup> and 4,7-dimethoxy-1,10-phenanthroline,<sup>5</sup> respectively. 2,9-Dimethyl-4,7-bis(trifluoromethyl)-1,10-phenanthroline was obtained by chlorine-iodine exchange<sup>6</sup> of 2,9-dimethyl-4,7-dichloro-1,10-phenanthroline and coupling<sup>7</sup> of the iodide with in situ generated (trifluoromethyl)copper. Arenes were purified by distillation from appropriate drying agents. All of other compounds were used as received.

**2,9-Dimethyl-4,7-bis(dimethylamino)-1,10-phenanthroline.**  $^1\text{H}$  NMR (400 MHz,  $\text{CDCl}_3$ )  $\delta$  2.84 (s, 6H), 3.03 (s, 12H), 6.88 (s, 2H), 7.89 (s, 2H);  $^{13}\text{C}$  NMR (100 MHz)  $\delta$  26.32, 44.11, 109.93, 119.85, 120.64, 147.34, 157.72, 158.92; LRMS (EI)  $m/z$  294 ( $\text{M}^+$ , 100), 279 (9.5), 263 (6.3), 250 (4.9), 236 (3.6), 147 (5.9), 139 (4.5); HRMS (EI) calcd for  $\text{C}_{18}\text{H}_{22}\text{N}_4$  294.1844, found 294.1833.

**2,9-Dimethyl-4,7-dimethoxy-1,10-phenanthroline.**  $^1\text{H}$  NMR (400 MHz,  $\text{CDCl}_3$ )  $\delta$  2.89 (s, 6H), 4.07 (s, 6H), 6.86 (s, 2H), 8.08 (s, 2H);  $^{13}\text{C}$  NMR (100 MHz,  $\text{CDCl}_3$ )  $\delta$  26.63, 55.66, 102.74, 117.95, 119.42, 145.97, 160.26, 162.28; LRMS (EI)  $m/z$  268 ( $\text{M}^+$ , 100), 253 (14.1), 225 (22.8), 210 (4), 182 (7.5), 134 (4.9); HRMS (EI) calcd for  $\text{C}_{16}\text{H}_{16}\text{N}_2\text{O}_2$  268.1212, found 268.1207.

**2,9-Dimethyl-4,7-bis(trifluoromethyl)-1,10-phenanthroline.**  $^1\text{H}$  NMR (400 MHz,  $\text{CDCl}_3$ )  $\delta$  3.05 (s, 6H), 7.86 (s, 2H), 8.19 (s, 2H);  $^{13}\text{C}$  NMR (100 MHz,  $\text{CDCl}_3$ )  $\delta$  26.13, 120.81 (q,  $J = 5.2$  Hz),

121.90 (q,  $J = 1.7$  Hz), 122.78 (q,  $J = 1.7$  Hz), 123.30 (q,  $J = 274.2$  Hz), 134.74 (q,  $J = 319.4$ ), 146.09, 159.94; LRMS (EI)  $m/z$  344 ( $M^+$ , 100), 325 (4.7), 274 (6.7), 172 (5.5), 40 (9.3); HRMS (EI) calcd for  $C_{16}H_{10}N_2F_6$  344.0748, found 344.0750.

**General procedure for the C–H silylation (Table 2).** An oven-dried flask fitted with a condenser and a nitrogen bubbler was charged with 1-hydrosilatrane (1.0 mmol),  $[\{Ir(OMe)(cod)\}_2]$  (0.015 mmol) and dmphen (0.03 mmol), and then flushed with nitrogen. Under a positive flow of nitrogen, an arene (60 mmol) was added. The reaction mixture was stirred at 120°C for 32 h. The product was isolated by Kugelrohr distillation to give an analytically pure sample.

**1-(3,4-Dichlorophenyl)-2,8,9-trioxa-5-aza-1-silabicyclo[3.3.3]undecane (3b).**

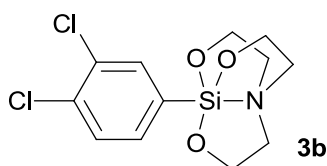

$^1H$  NMR (400 MHz,  $CDCl_3$ )  $\delta$  2.92(t,  $J = 5.9$  Hz, 6 H), 3.89 (t,  $J = 5.9$  Hz, 6 H), 7.32 (d,  $J = 7.8$  Hz, 1 H), 7.53 (dd,  $J = 1.5, 7.8$  Hz, 1H), 7.79 (d,  $J = 1.5$  Hz, 1 H);  $^{13}C$  NMR (100 MHz,  $CDCl_3$ )  $\delta$  50.95, 57.48, 129.22, 131.23, 131.28, 133.57, 136.19, 143.66; LRMS (EI)  $m/z$  319 ( $M^+$ , 8), 174 (100); HRMS (EI) calcd for  $C_{12}H_{15}NO_3SiCl_2$  319.0198, found 319.0198.

**1-(5-Indanyl)-2,8,9-trioxa-5-aza-1-silabicyclo[3.3.3]undecane (3c).**

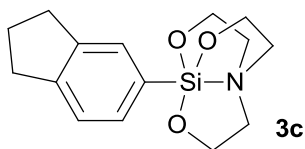

$^1H$  NMR (400 MHz,  $CDCl_3$ )  $\delta$  1.94-2.01 (m, 2 H), 2.81-2.90 (m, 7 H), 3.88 (t,  $J = 5.9$  Hz, 6 H), 7.13 (d,  $J = 7.3$  Hz, 1 H), 7.50 (d,  $J = 7.3$  Hz, 1 H), 7.59 (s, 1H);  $^{13}C$  NMR (100 MHz,  $CDCl_3$ )  $\delta$  25.31, 32.76, 32.81, 51.08, 57.80, 123.33, 129.81, 131.82, 138.77, 142.82, 143.61; LRMS (EI)  $m/z$  291 ( $M^+$ , 19.7), 174 (100); HRMS (EI) calcd for  $C_{15}H_{21}NO_3Si$  291.1291, found 291.1293.

**1-(6-Tetralinyl)-2,8,9-trioxa-5-aza-1-silabicyclo[3.3.3]undecane (3d).**

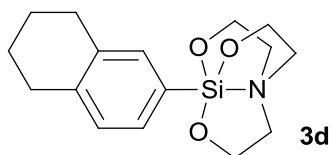

$^1\text{H}$  NMR (400 MHz,  $\text{CDCl}_3$ )  $\delta$  1.72-1.75 (m, 4 H), 2.69 (br s, 2 H), 2.75 (br s, 2 H), 2.89 (t,  $J = 5.9$  Hz, 6 H), 3.88 (t,  $J = 5.9$  Hz, 6 H), 6.96 (d,  $J = 7.3$  Hz, 1 H), 7.41 (s, 1 H), 7.42 (d,  $J = 7.8$  Hz, 1 H);  $^{13}\text{C}$  NMR (100 MHz,  $\text{CDCl}_3$ )  $\delta$  23.45, 23.56, 29.40, 29.49, 51.18, 57.86, 128.10, 131.14, 134.74, 135.65, 136.63, 137.98; LRMS (EI)  $m/z$  305 ( $\text{M}^+$ , 18.5), 174 (100); HRMS (EI) calcd for  $\text{C}_{16}\text{H}_{23}\text{NO}_3\text{Si}$  305.1447, found 305.1449.

**1-(2,3-dihydrobenzo[*b*][1,4]dioxin-6-yl)-2,8,9-trioxa-5-aza-1-silabicyclo[3.3.3]undecane (3e).**

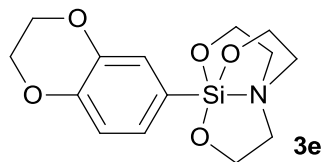

$^1\text{H}$  NMR (400 MHz,  $\text{CDCl}_3$ )  $\delta$  2.90 (t,  $J = 5.9$  Hz, 6 H), 3.88 (t,  $J = 5.9$  Hz, 6 H), 4.20 (s, 3 H), 6.78 (d,  $J = 8.0$  Hz, 1 H), 7.20 (dd,  $J = 1.5$  and 8.0 Hz, 1 H), 7.25 (d,  $J = 1.5$  Hz, 1 H);  $^{13}\text{C}$  NMR (100 MHz,  $\text{CDCl}_3$ )  $\delta$  51.06, 57.72, 64.26, 64.53, 116.28, 123.06, 127.38, 134.79, 142.78, 143.42; LRMS(EI)  $m/z$  311 ( $\text{M}^+$ , 59.2), 174 (100); HRMS (EI) calcd for  $\text{C}_{14}\text{H}_{21}\text{NO}_5\text{Si}$  309.1032, found 309.1031.

**1-(3,4-Dimethylphenyl)-2,8,9-trioxa-5-aza-1-silabicyclo[3.3.3]undecane (3f).**

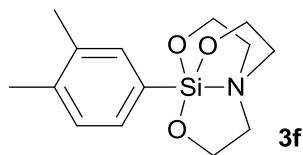

$^1\text{H}$  NMR (400 MHz,  $\text{CDCl}_3$ )  $\delta$  2.19 (s, 3 H), 2.29 (s, 3 H), 2.87 (t,  $J = 6.0$  Hz, 6 H), 3.87 (t,  $J = 5.9$  Hz, 6 H), 7.03 (d,  $J = 7.3$  Hz, 1 H), 7.44 (d,  $J = 7.6$  Hz, 1 H), 7.47 (s, 1 H);  $^{13}\text{C}$  NMR (100 MHz,  $\text{CDCl}_3$ )  $\delta$  19.68, 19.79, 51.11, 57.83, 128.66, 131.67, 134.96, 135.28, 135.85, 138.67; LRMS (EI)  $m/z$  279 ( $\text{M}^+$ , 23), 236 (3.2), 206 (3.1), 174 (100), 119 (3); HRMS (EI) calcd for  $\text{C}_{14}\text{H}_{21}\text{O}_3\text{NSi}$  279.1291, found 279.1301.

**1-(3,4-Dimethoxyphenyl)-2,8,9-trioxa-5-aza-1-silabicyclo[3.3.3]undecane (3g).**

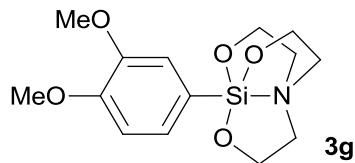

$^1\text{H}$  NMR (400 MHz,  $\text{CDCl}_3$ )  $\delta$  2.92 (t,  $J = 6.1$  Hz, 6 H), 3.84 (s, 3 H), 3.90 (t,  $J = 5.9$  Hz, 6 H), 3.91 (s, 3 H), 6.83 (d,  $J = 7.8$ , 1 H), 7.28 (d,  $J = 1.5$  Hz, 1 H), 7.30 (dd,  $J = 1.4$  and 7.8 Hz, 1 H);  $^{13}\text{C}$  NMR (100

MHz, CDCl<sub>3</sub>) δ 51.09, 55.59, 55.68, 57.81, 110.78, 116.65, 127.11, 133.67, 147.98, 148.88; LRMS(EI) m/z 311 (M<sup>+</sup>, 59.2), 174 (100); HRMS (EI) calcd for C<sub>14</sub>H<sub>21</sub>NO<sub>5</sub>Si 311.1189, found 311.1194.

**1-[3,5-Bis(trifluoromethyl)phenyl]-2,8,9-trioxa-5-aza-1-silabicyclo[3.3.3]undecane (3h).**

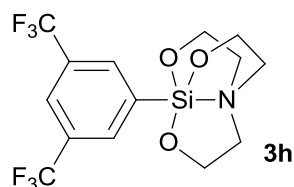

<sup>1</sup>H NMR (400 MHz, CDCl<sub>3</sub>) δ 2.95 (t, *J* = 6.1 Hz, 6 H), 3.92 (t, *J* = 6.1 Hz, 6 H), 7.71 (s, 1 H), 8.18 (s, 2H); <sup>13</sup>C NMR (100 MHz, CDCl<sub>3</sub>) δ 50.97, 57.44, 121.09-121.25 (m), 124.18 (q, *J* = 272.3 Hz), 129.45 (q, *J* = 31.9 Hz), 134.25-134.50 (m), 146.26; LRMS (EI) m/z 387 (M<sup>+</sup>, 3.2), 174 (100); HRMS (EI) calcd for C<sub>14</sub>H<sub>15</sub>NO<sub>3</sub>F<sub>6</sub>Si 387.0725, found 387.0722.

**1-(3,5-Dichlorophenyl)-2,8,9-trioxa-5-aza-1-silabicyclo[3.3.3]undecane (3a).**

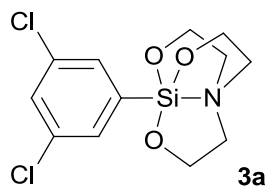

<sup>1</sup>H NMR (400 MHz, CDCl<sub>3</sub>) δ 2.94 (t, *J* = 6.1 Hz, 6 H), 3.91 (t, *J* = 6.1 Hz, 6 H), 7.21 (t, *J* = 2.0 Hz, 1 H), 7.58 (d, *J* = 2.0 Hz, 2 H); <sup>13</sup>C NMR (100 MHz, CDCl<sub>3</sub>) δ 51.01, 57.49, 127.42, 132.31, 133.93, 147.25; LEMS (EI) m/z 319 (M<sup>+</sup>, 5.4), 174 (100), 130 (3); HRMS (EI) calcd for C<sub>12</sub>H<sub>15</sub>NO<sub>3</sub>SiCl<sub>2</sub> 319.0198, found 319.0204.

**1-(3,5-Dimethylphenyl)-2,8,9-trioxa-5-aza-1-silabicyclo[3.3.3]undecane (3i).**

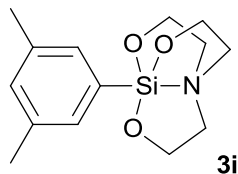

<sup>1</sup>H NMR (400 MHz, CDCl<sub>3</sub>) δ 2.27 (s, 6 H), 2.90 (t, *J* = 5.9 Hz, 6 H), 3.90 (t, *J* = 5.9 Hz, 6 H), 6.88 (s, 1 H), 7.35 (s, 2 H); <sup>13</sup>C NMR (100 MHz, CDCl<sub>3</sub>) δ 21.45, 51.09, 57.82, 129.58, 131.68, 136.26, 141.12; LRMS (EI) m/z 279 (M<sup>+</sup>, 19), 174 (100), 148 (3.1), 119 (3.1), 105 (3.2); HRMS (EI) calcd for C<sub>14</sub>H<sub>21</sub>O<sub>3</sub>NSi 279.1291, found 279.1298.

**1-(3-Chloro-5-trifluoromethylphenyl)-2,8,9-trioxa-5-aza-1-silabicyclo[3.3.3]undecane (3j).**

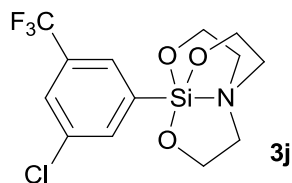

$^1\text{H}$  NMR (400 MHz,  $\text{CDCl}_3$ )  $\delta$  2.93 (t,  $J = 6.1$  Hz, 6 H), 3.91 (t,  $J = 5.9$  Hz, 6 H), 7.44 (s, 1 H), 7.87 (s, 2 H);  $^{13}\text{C}$  NMR (100 MHz,  $\text{CDCl}_3$ )  $\delta$  50.94, 57.44, 124.01 (q,  $J = 272.3$  Hz), 124.26 (q,  $J = 4.1$  Hz), 128.97 (q,  $J = 3.9$  Hz), 130.53 (q,  $J = 31.9$  Hz), 133.59, 137.68, 147.12; LRMS (EI)  $m/z$  353 ( $\text{M}^+$ , 4), 174 (100); HRMS (EI) calcd for  $\text{C}_{13}\text{H}_{15}\text{NO}_3\text{F}_3\text{SiCl}$  353.0462, found 353.0461.

### 1-(3-Chloro-5-methylphenyl)-2,8,9-trioxa-5-aza-1-silabicyclo[3.3.3]undecane (3k).

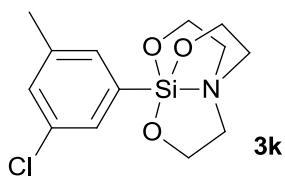

$^1\text{H}$  NMR (400 MHz,  $\text{CDCl}_3$ )  $\delta$  2.28 (s, 3 H), 2.92 (t,  $J = 5.9$  Hz, 6 H), 3.90 (t,  $J = 5.9$  Hz, 6 H), 7.02 (s, 1 H), 7.40 (s, 1 H), 7.51 (s, 1 H);  $^{13}\text{C}$  NMR (100 MHz,  $\text{CDCl}_3$ )  $\delta$  21.20, 50.98, 57.60, 128.28, 131.04, 132.83, 133.20, 138.38, 144.61; LRMS (EI)  $m/z$  299 ( $\text{M}^+$ , 10.3), 174 (100); HRMS (EI) calcd for  $\text{C}_{13}\text{H}_{18}\text{NClO}_3\text{Si}$  299.0744, found 299.0737.

**Cross-coupling of 1-(3,4-dimethylphenyl)-2,8,9-trioxa-5-aza-1-silabicyclo[3.3.3]undecane with 4-iodoacetophenone (Scheme 3).** A mixture of  $\text{Pd}(\text{OAc})_2$  (0.1 mmol),  $\text{PPh}_3$  (0.2 mmol), 1-(3,4-dimethylphenyl)-2,8,9-trioxa-5-aza-1-silabicyclo[3.3.3]undecane (2.0 mmol), 4-iodoacetophenone (1.0 mmol), and DMF (10 ml) was stirred at r.t. for 10 min. 1.0 M TBAF in THF (2.0 mmol) was added and the resulting mixture was stirred at 90 °C for 2 h. Isolation by column chromatography over silica gel gave an analytically pure sample.

### 4-(3,4-Dimethylphenyl)acetophenone 4.

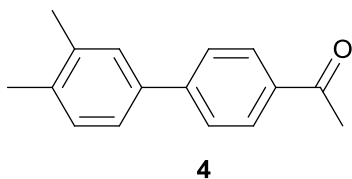

$^1\text{H}$  NMR (400 MHz,  $\text{CDCl}_3$ )  $\delta$  2.32 (s, 3 H), 2.35 (s, 3 H), 2.63 (s, 3 H), 7.24 (t,  $J = 6.6$  Hz, 1 H), 7.38 (dd,  $J = 2.0$  and 7.8 Hz, 1 H), 7.42 (d,  $J = 1.5$  Hz, 1 H), 7.67 (dt,  $J = 2.0$  and 8.3 Hz, 2 H), 8.02 (dt,  $J =$

2.0 and 8.8 Hz, 2 H);  $^{13}\text{C}$  NMR (100 MHz,  $\text{CDCl}_3$ )  $\delta$  19.48, 19.90, 26.61, 124.59, 126.92, 128.43, 128.84, 130.22, 135.50, 136.89, 137.16, 137.38, 145.84, 197.74; HRMS (EI) calcd for  $\text{C}_{16}\text{H}_{16}\text{O}$  224.1201, found 224.1199.

## References

- 1 R. Uson, L. A. Oro, J. A. Cabeza, *Inorg. Synth.* **1985**, 23, 126.
- 2 T. Saiki, Y. Nishio, T. Ishiyama, N. Miyaura, *Organometallics* **2006**, 25, 6068.
- 3 J. D. Nies, J. M. Bellama, N. Ben-Zvi, *J. Organomet. Chem.* **1985**, 296, 315.
- 4 M. Schmittel, H. Ammon, *Eur. J. Org. Chem.* **1998**, 785.
- 5 P. Wehman, V. E. Kaasjager, W. G. J. de Lange, F. Hartl, P. C. J. Kamer, W. N. M. van Leeuwen, *Organometallics* **1995**, 14, 3751.
- 6 C. Wolf, G. E. Tumambac, C. N. Villalobos, *Synlett* **2003**, 1801.
- 7 F. Cottet, M. Schlosser, *Eur. J. Org. Chem.* **2002**, 327

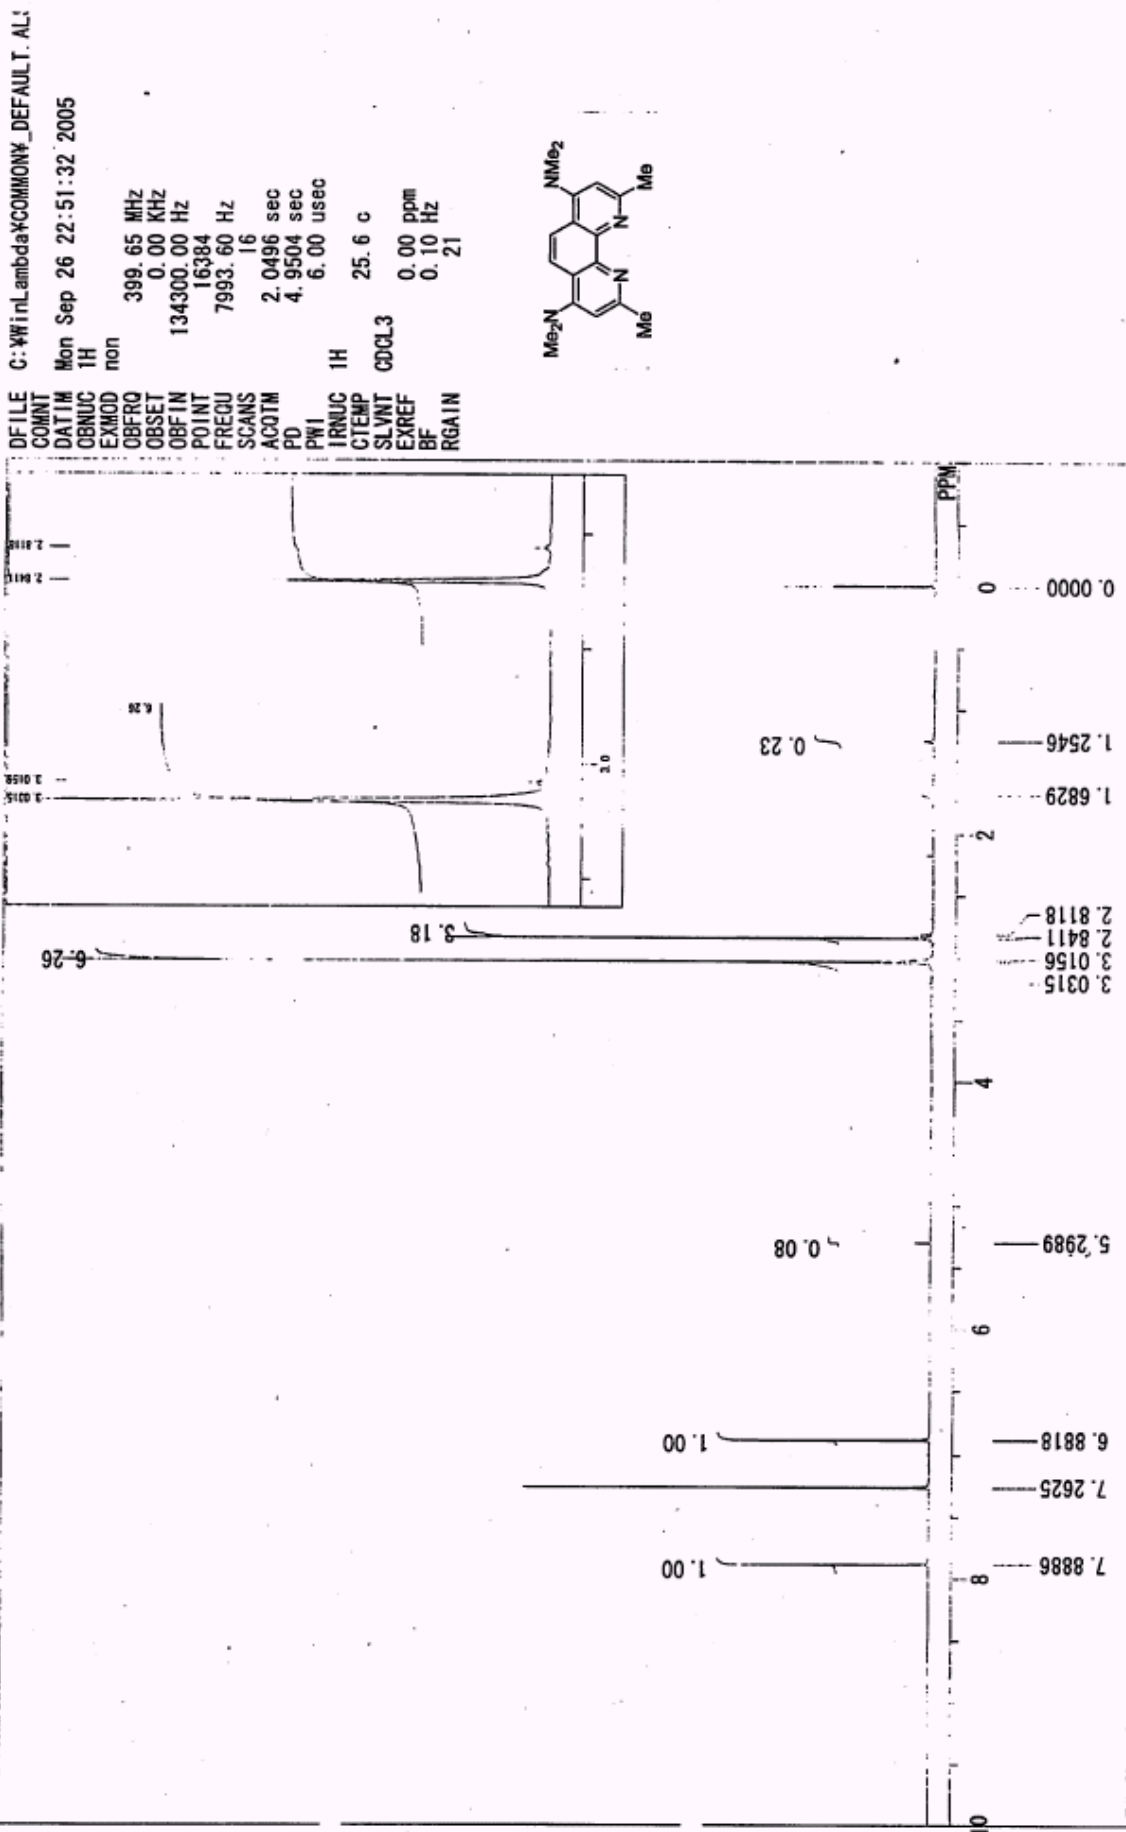

DFILE C:\WINLAMBDA\COMMONY\_DEFAULT.AL

CONNT  
DATIN  
OBNUC  
EXMOD  
OBFRQ  
OBSET  
OBFIN  
POINT  
FREOU  
SCANS  
ACQTH  
PD  
PWI  
IRNUC  
GTEMP  
SLVNT  
EXREF  
BF  
RGAIN

Mon Sep 26 22:41:59 2005

13C  
bcm

100.40 MHz

0.00 KHz

135500.00 Hz

32768

27100.27 Hz

1024

1.2091 sec

1.7909 sec

4.50 usec

1H

26.1 C

CDCL3

77.00 ppm

0.10 Hz

30

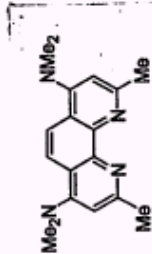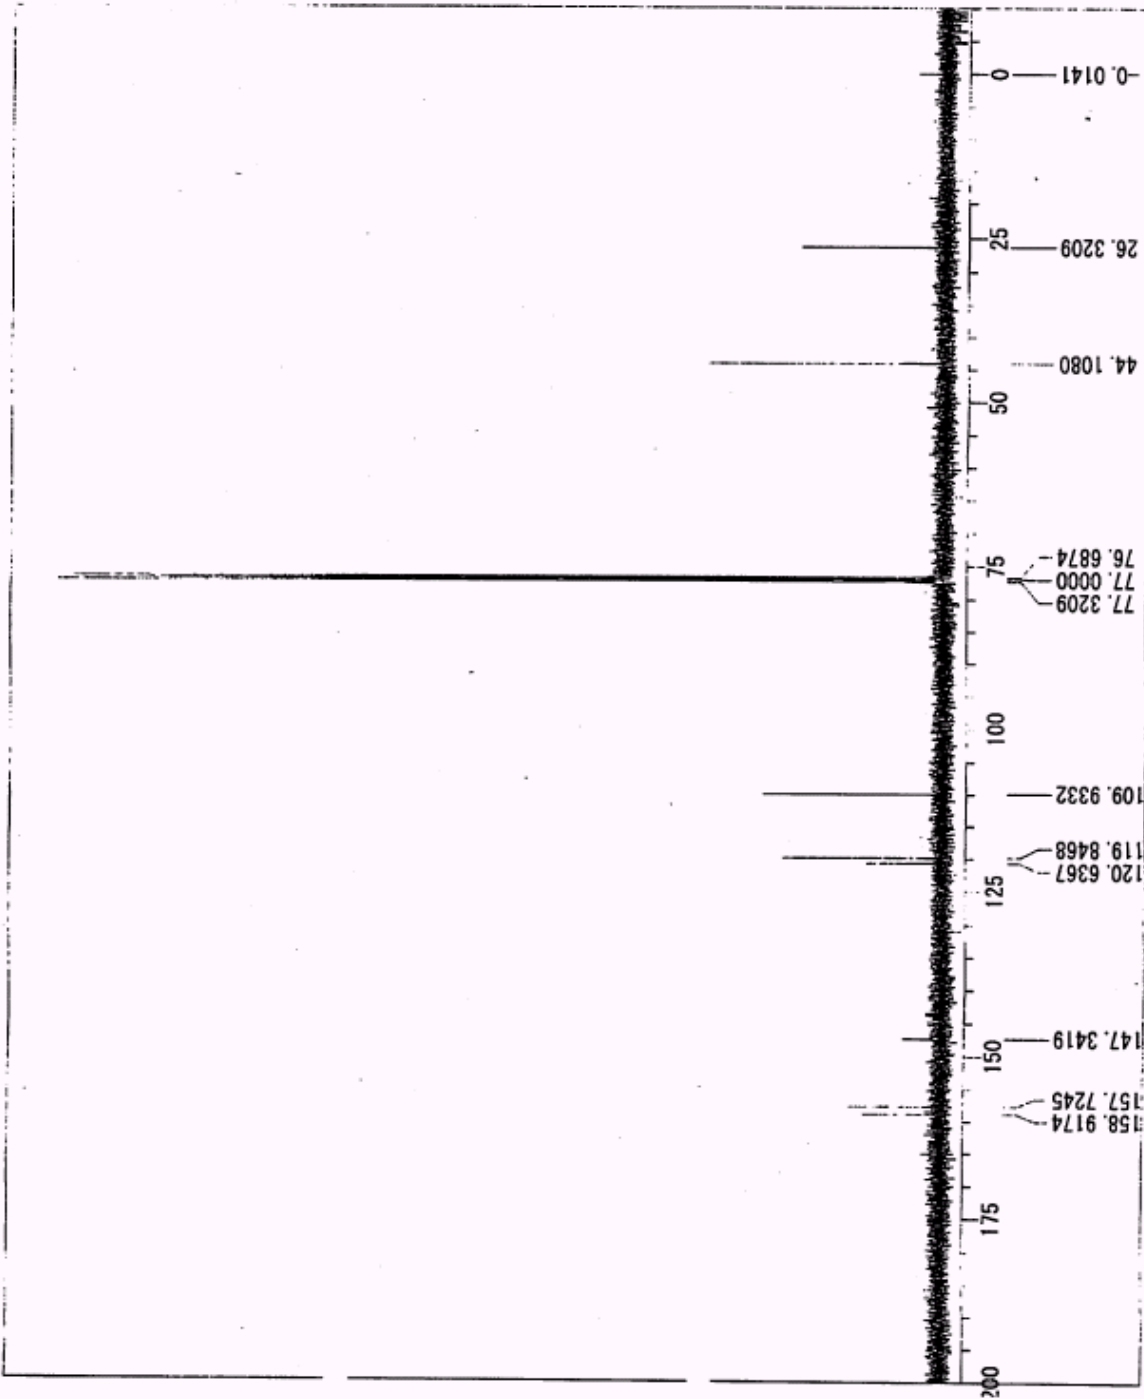



DFILE E:\47d\imeodmphen. ALS  
 CONMT Wed Sep 07 17:02:36 2005  
 DATIM 1H  
 OBNUC non  
 EXMOD 399.65 MHz  
 OBFFRO 0.00 KHz  
 OBSET 134300.00 Hz  
 OBFIN 16384  
 POINT 7993.60 Hz  
 FREQU 16  
 SCANS 2.0496 sec  
 ACQTM 4.9504 sec  
 PD 6.00 usec  
 PW1 1H  
 IRNUC 24.3 c  
 CTEMP 0.00 ppm  
 SLVNT CDCL3  
 EXREF 0.12 Hz  
 BF 19  
 RGAIN

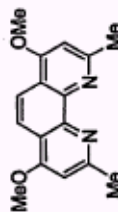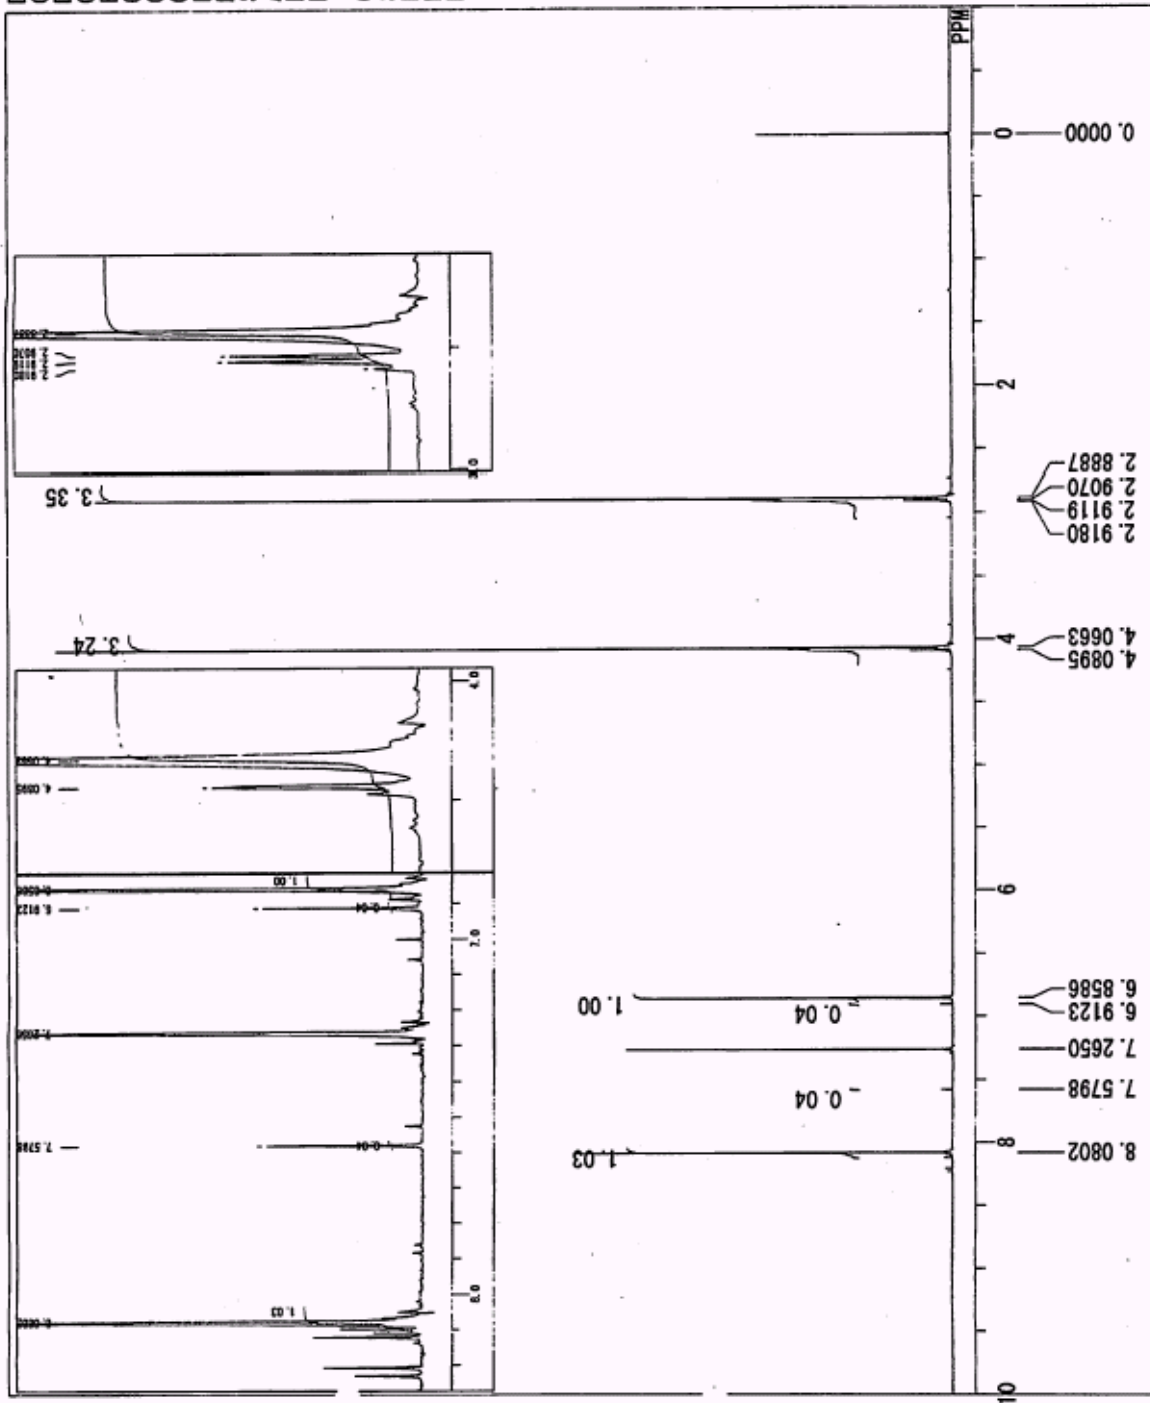

C:\WIN\lambdambda\COMMON\DEFAULT.AL:

DF FILE  
COMNT  
DATIM Wed Sep 07 17:29:45 2005  
OBNUC 13C  
EXMOD bcm  
OBFRO 100.40 MHz  
OBSET 0.00 KHz  
OBFIN 135500.00 Hz  
POINT 32768  
FREQU 27100.27 Hz  
SCANS 512  
ACQTM 1.2091 sec  
PD 1.7909 sec  
PWI 4.50 usec  
IRNUC 1H  
CTEMP 25.4 c  
SLVNT CDCL3  
EXREF 0.00 ppm  
BF 0.12 Hz  
RGAIN 31

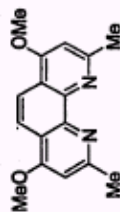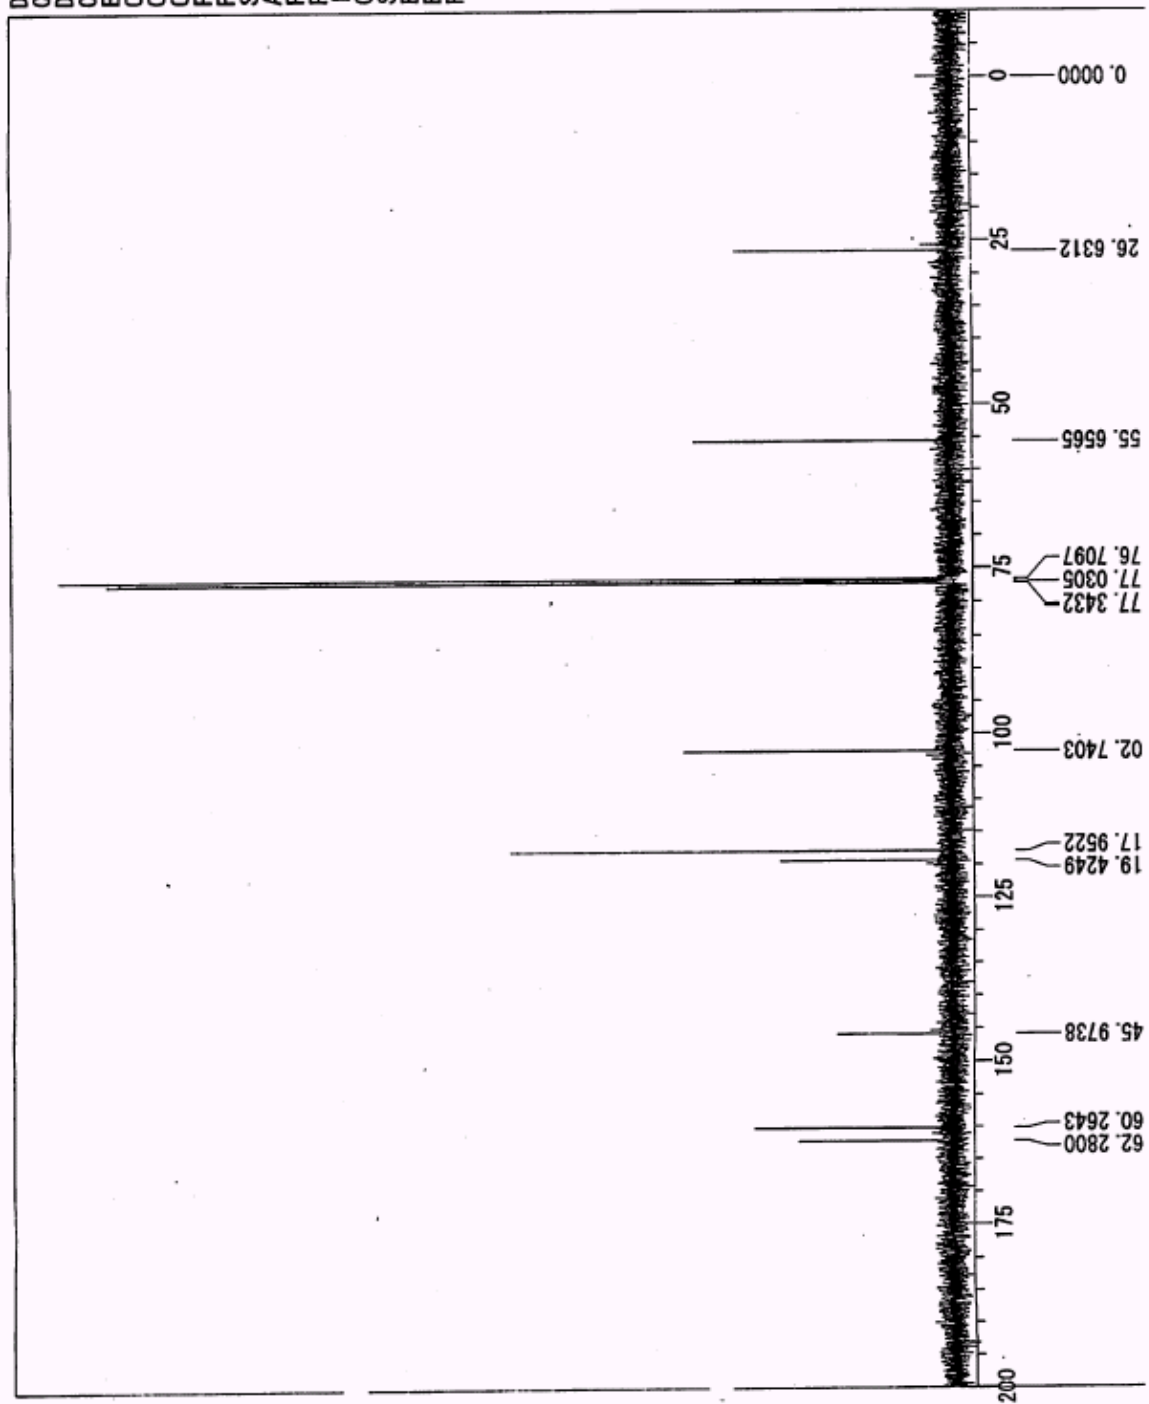

C:\Documents and Settings\lambdr

Tue Oct 18 20:41:14 2005

DF FILE  
COMNT  
DATIM  
OBNUC  
EXMOD  
OBFRO  
OBSET  
OBFIN  
POINT  
FREQU  
SCANS  
ACQTM  
PD  
PWI  
IRNUC  
CTEMP  
SLVNT  
EXREF  
BF  
RGAIN

1H  
non  
399.65 MHz  
0.00 KHz  
134300.00 Hz  
16384  
7993.60 Hz  
16  
2.0496 sec  
4.9500 sec  
6.00 usec  
1H  
25.3 c  
CDCL3  
0.00 ppm  
0.12 Hz  
17

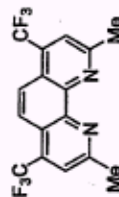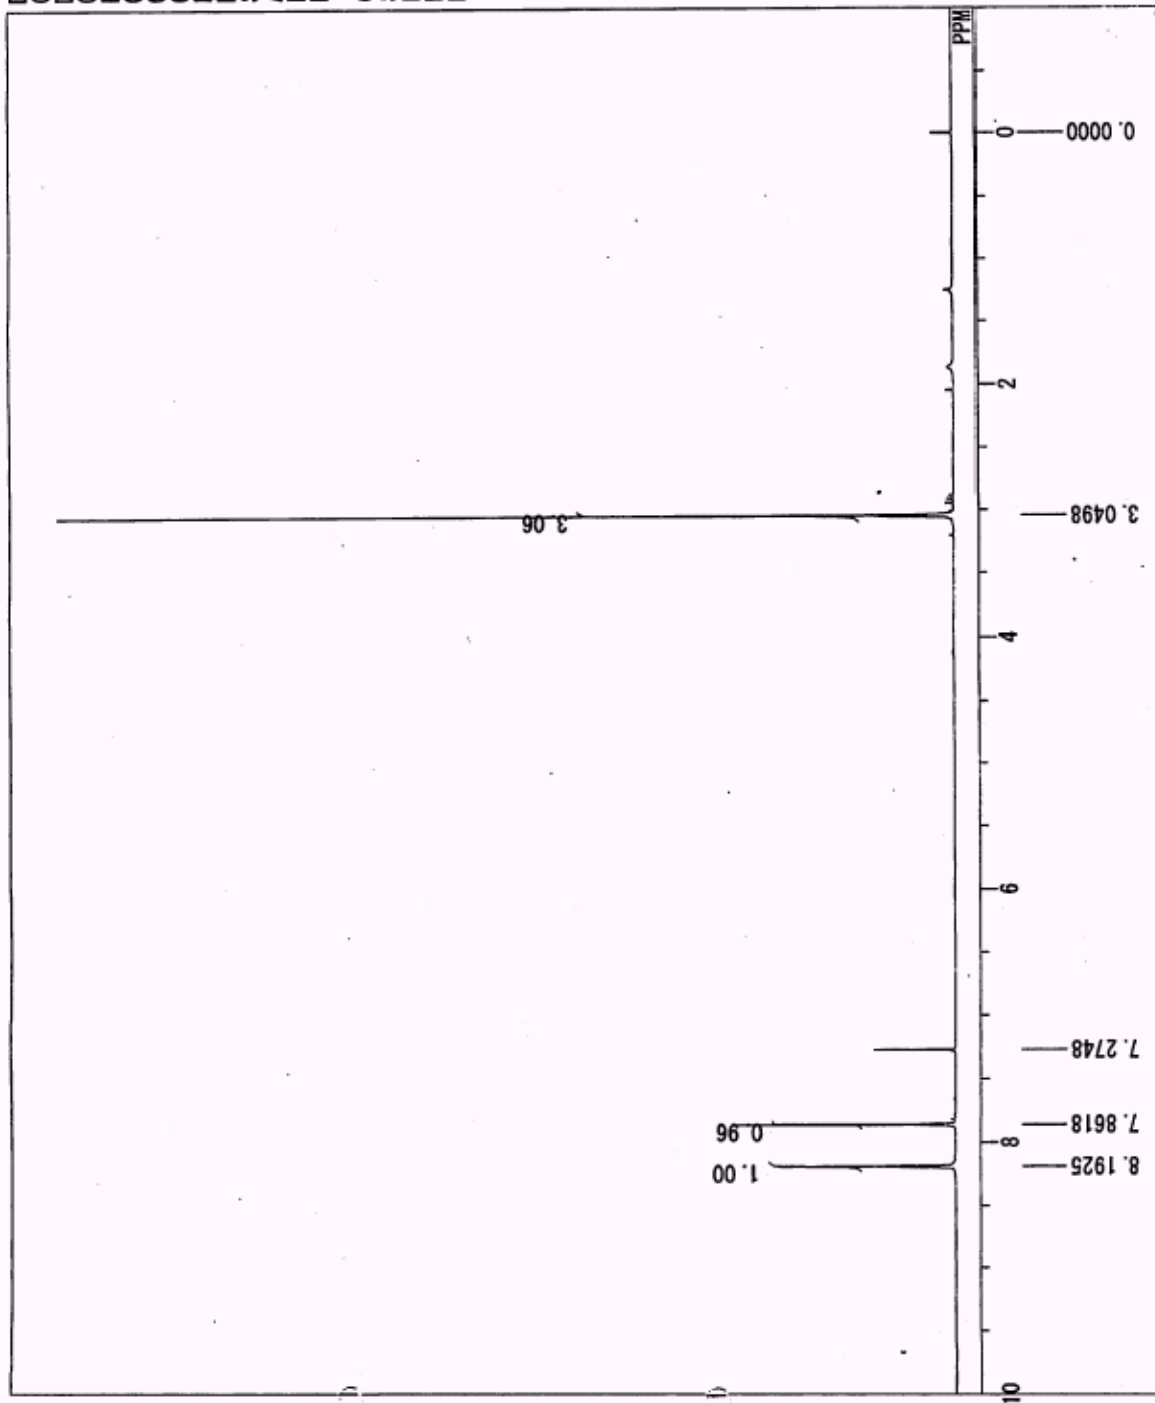

C:\WINL\lambdambda\COMMON\DEFAULT.AL

DFILE  
COMNT  
DATIM  
OBNUC  
EXMOD  
OBFRO  
OBSET  
OBFIN  
POINT  
FREQU  
SCANS  
ACQTM  
PD  
PWI  
IRNUC  
CTEMP  
SLVNT  
EXREF  
BF  
RGAIN

Tue Oct 18 22:02:24 2005  
13C  
bcm  
100.40 MHz  
0.00 KHz  
135500.00 Hz  
32768  
27100.27 Hz  
1024  
1.2091 sec  
1.7909 sec  
4.50 usec  
1H  
26.4 C  
CDCL3  
77.00 ppm  
0.12 Hz  
30

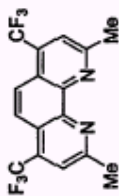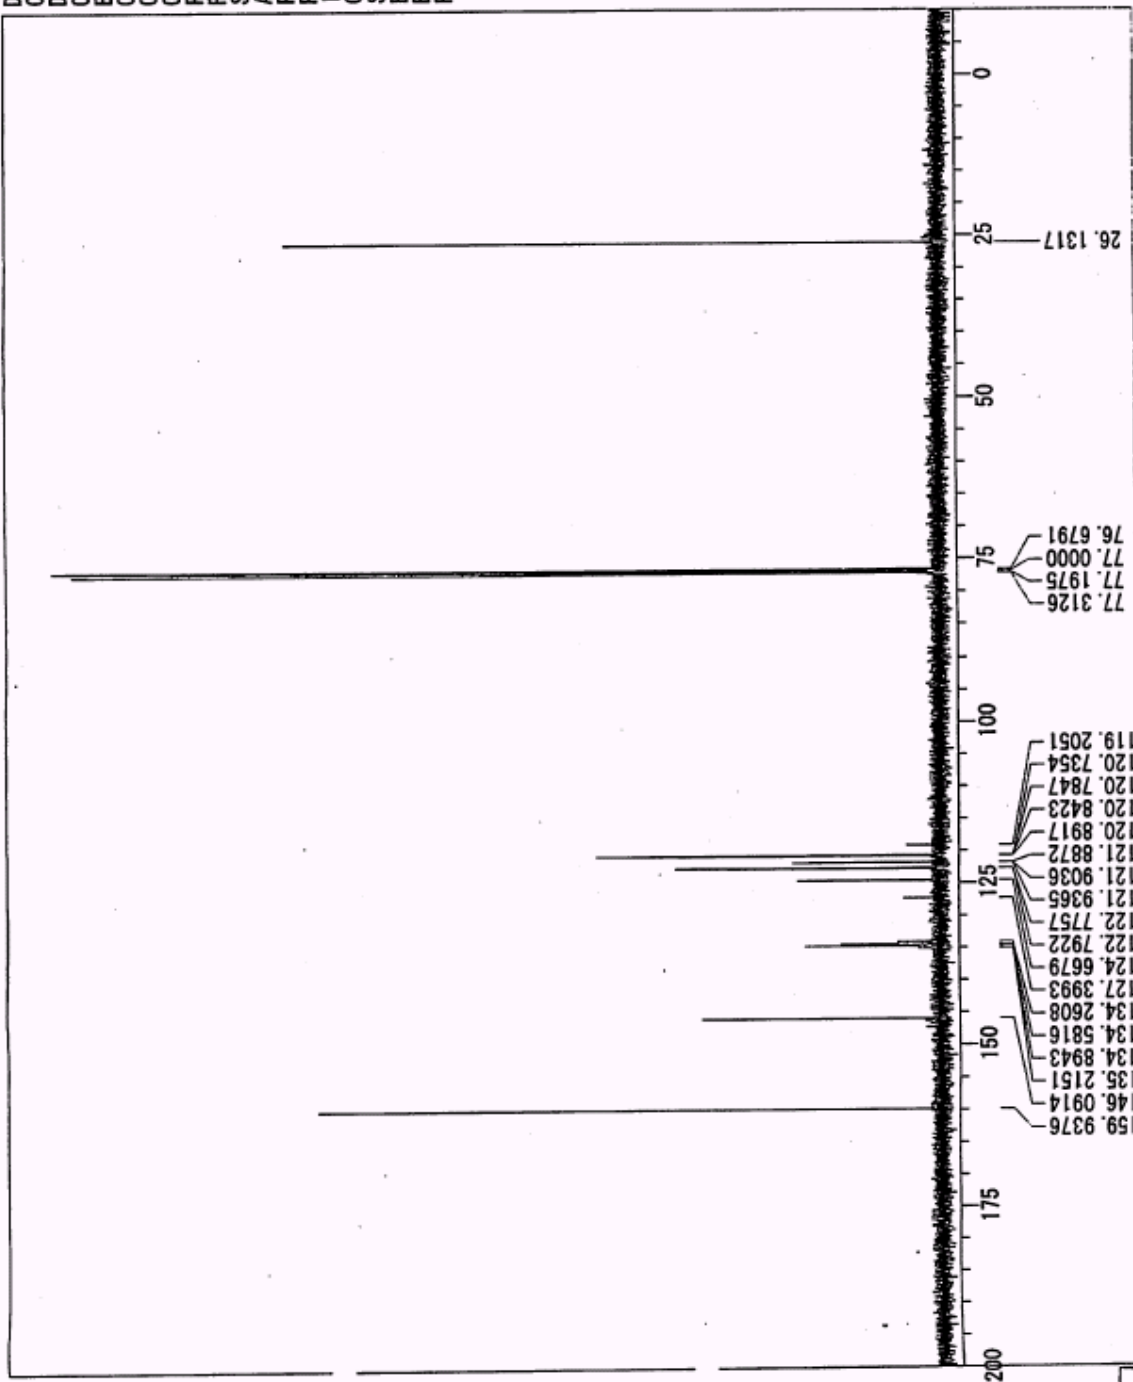

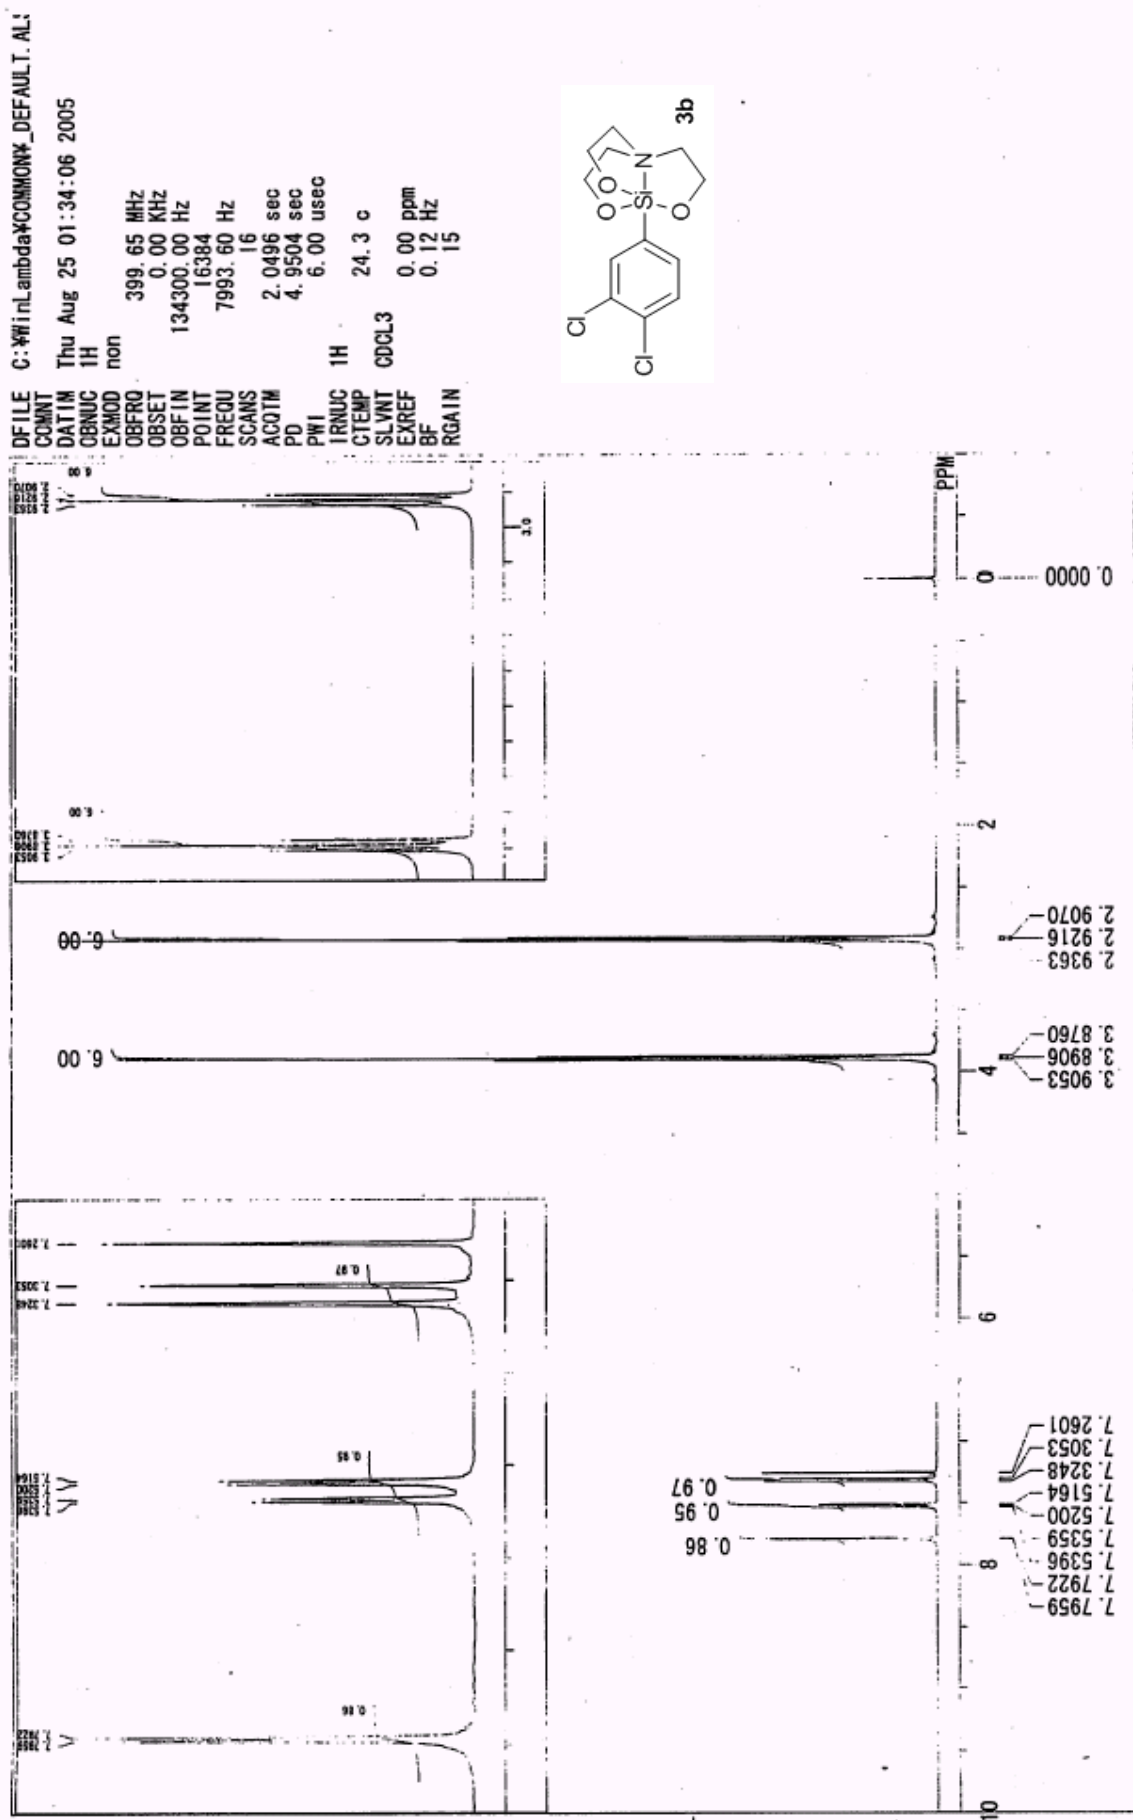

C:\Documents and Settings\lambdi

DFILE  
COMNT  
DATIM  
OBNUC  
EXMOD  
OBFRQ  
OBSET  
OBFIN  
POINT  
FREQU  
SCANS  
ACQTM  
PD  
PWI  
IRNUC  
CTEMP  
SLVNT  
EXREF  
BF  
RGAIN

Thu Aug 25 00:41:53 2005  
13C  
bcm  
100.40 MHz  
0.00 KHz  
135500.00 Hz  
32768  
27100.27 Hz  
512  
1.2091 sec  
1.7909 sec  
4.50 usec  
1H  
24.6 c  
CDCL3  
77.00 ppm  
0.12 Hz  
29

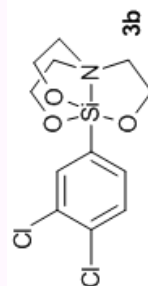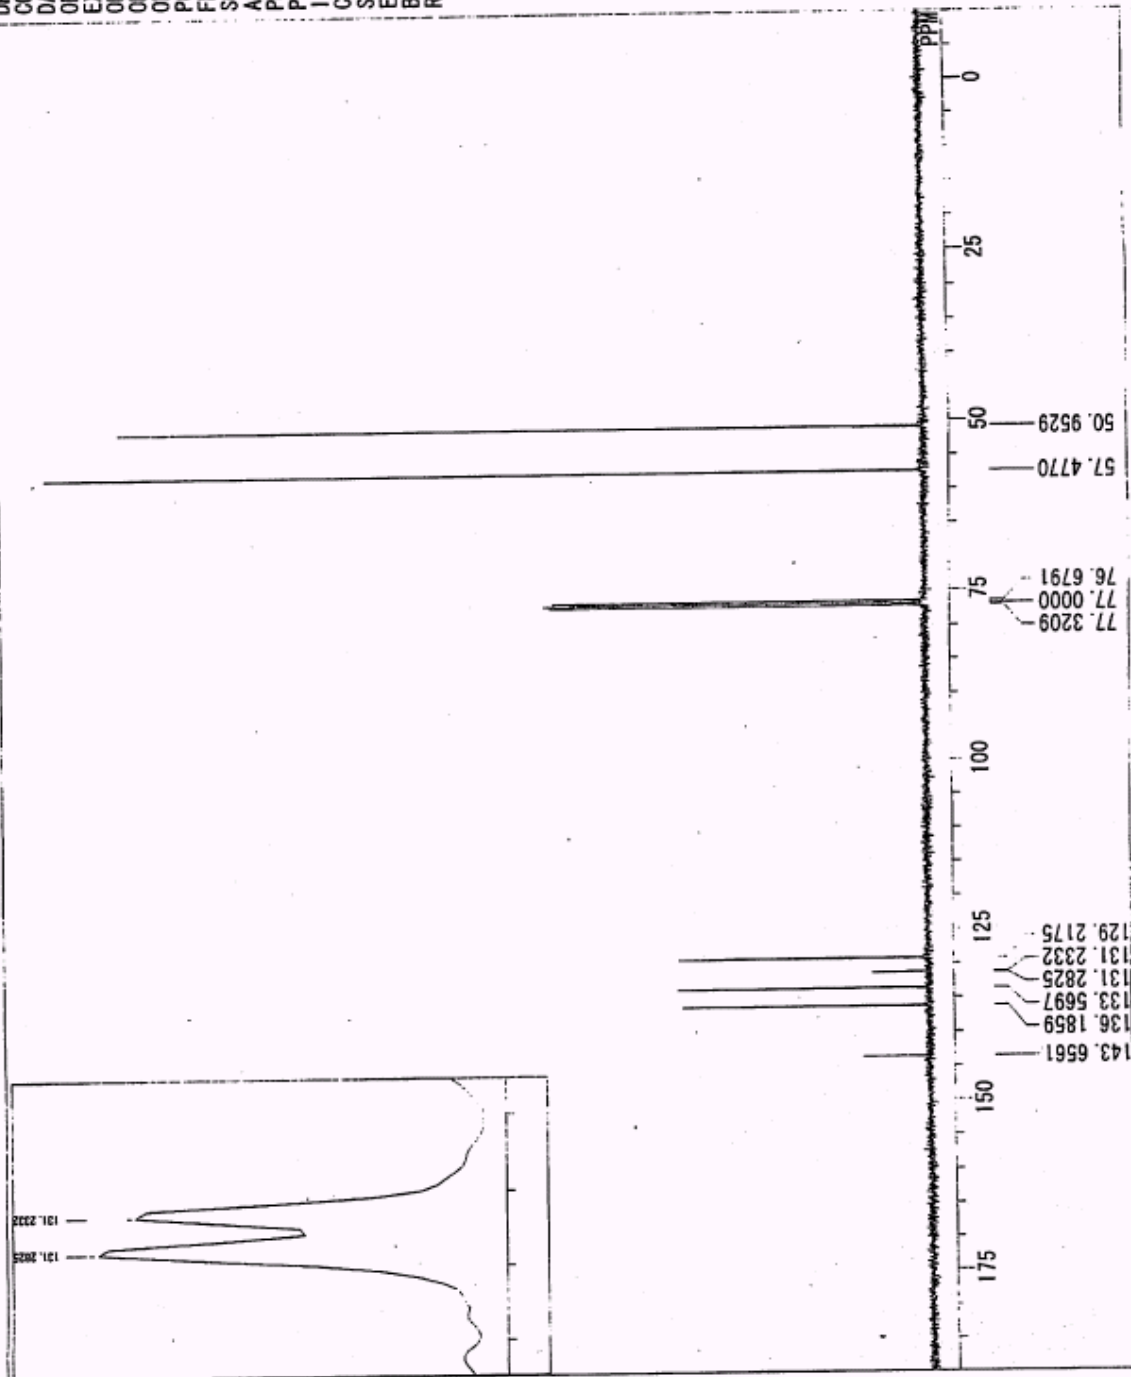

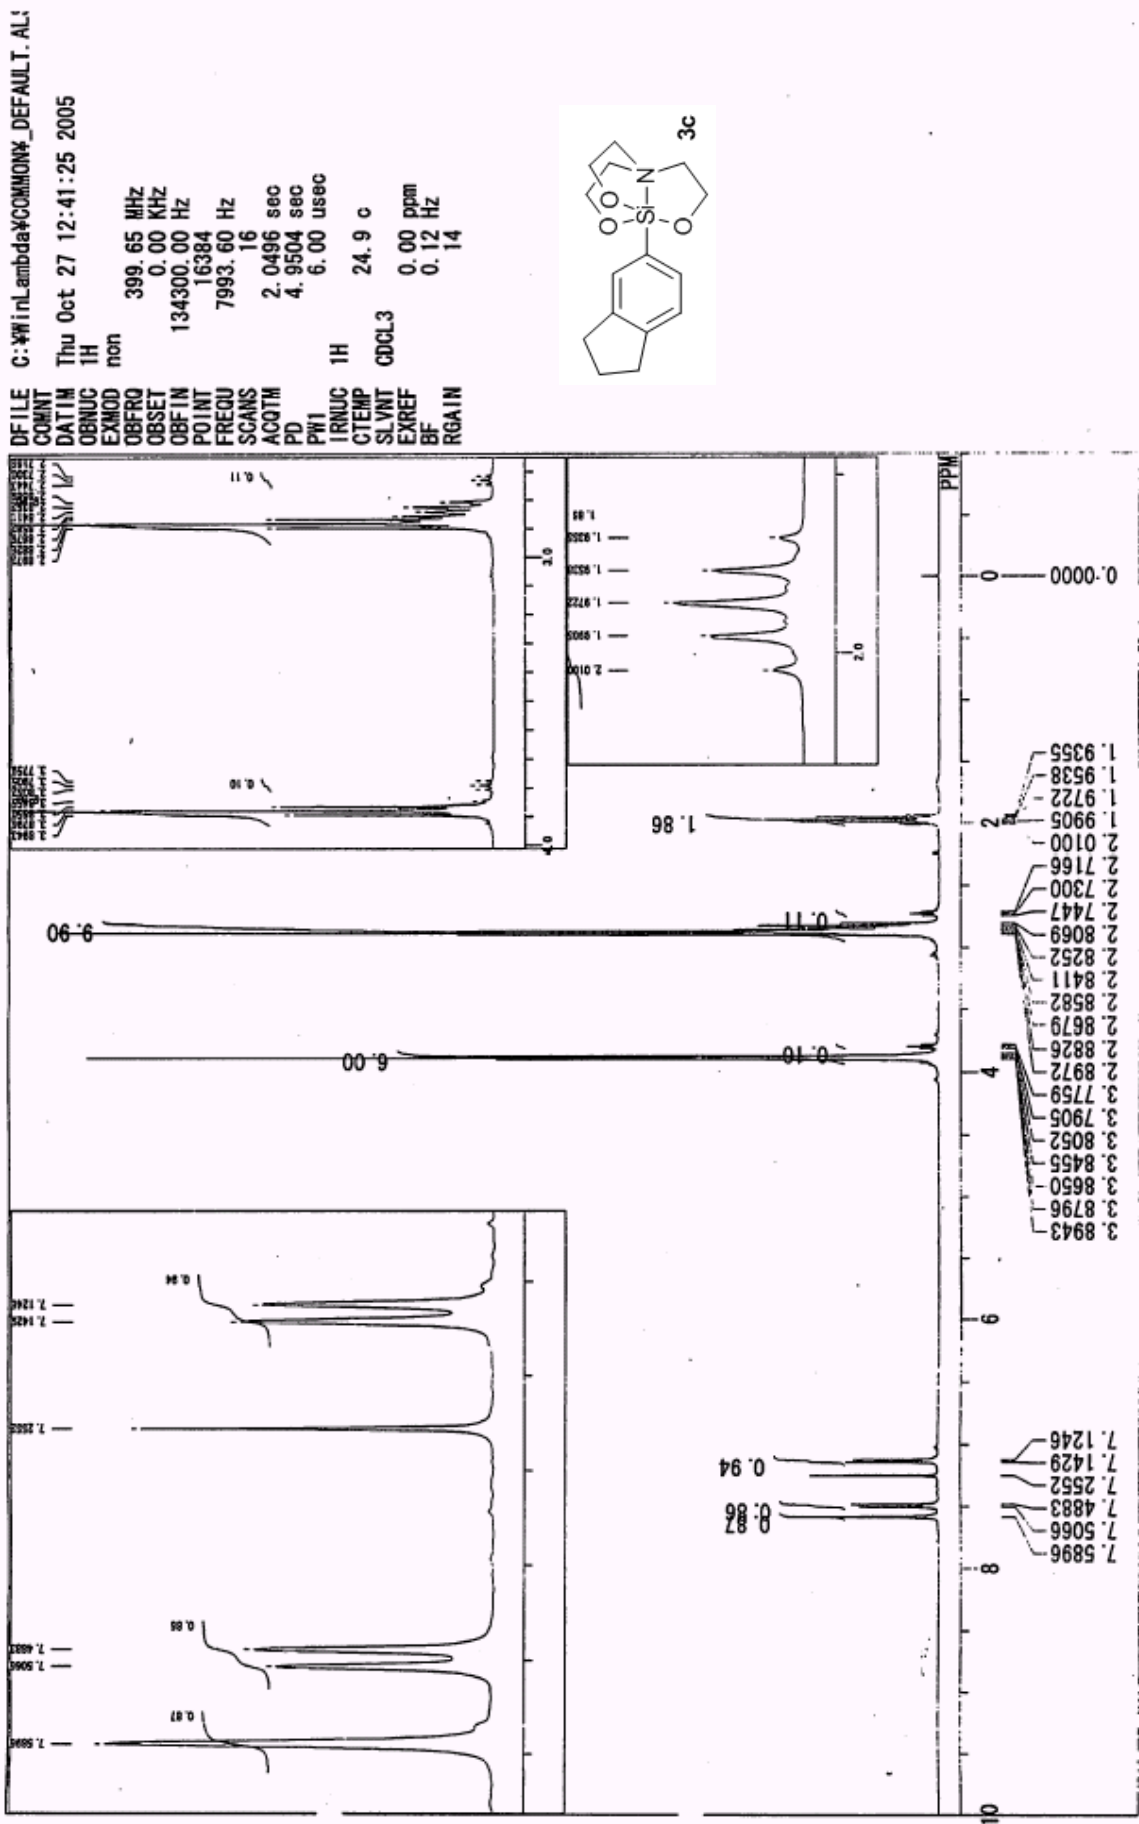

C:\WIN\lambda\COMMON\DEFAULT.AL:

Thu Oct 27 13:08:40 2005

13C

bcm

100.40 MHz

0.00 KHz

135500.00 Hz

32768

27100.27 Hz

350

1.2091 sec

1.7909 sec

4.50 usec

1H

25.9 c

CDCL3

77.00 ppm

0.12 Hz

29

DFILE  
COMNT  
DATIN  
OBNUC  
EXMOD  
OBFRQ  
OBSET  
OBFIN  
POINT  
FREQU  
SCANS  
ACQTM  
PD  
PWI  
IRNUC  
CTEMP  
SLVNT  
EXREF  
BF  
RGAIN

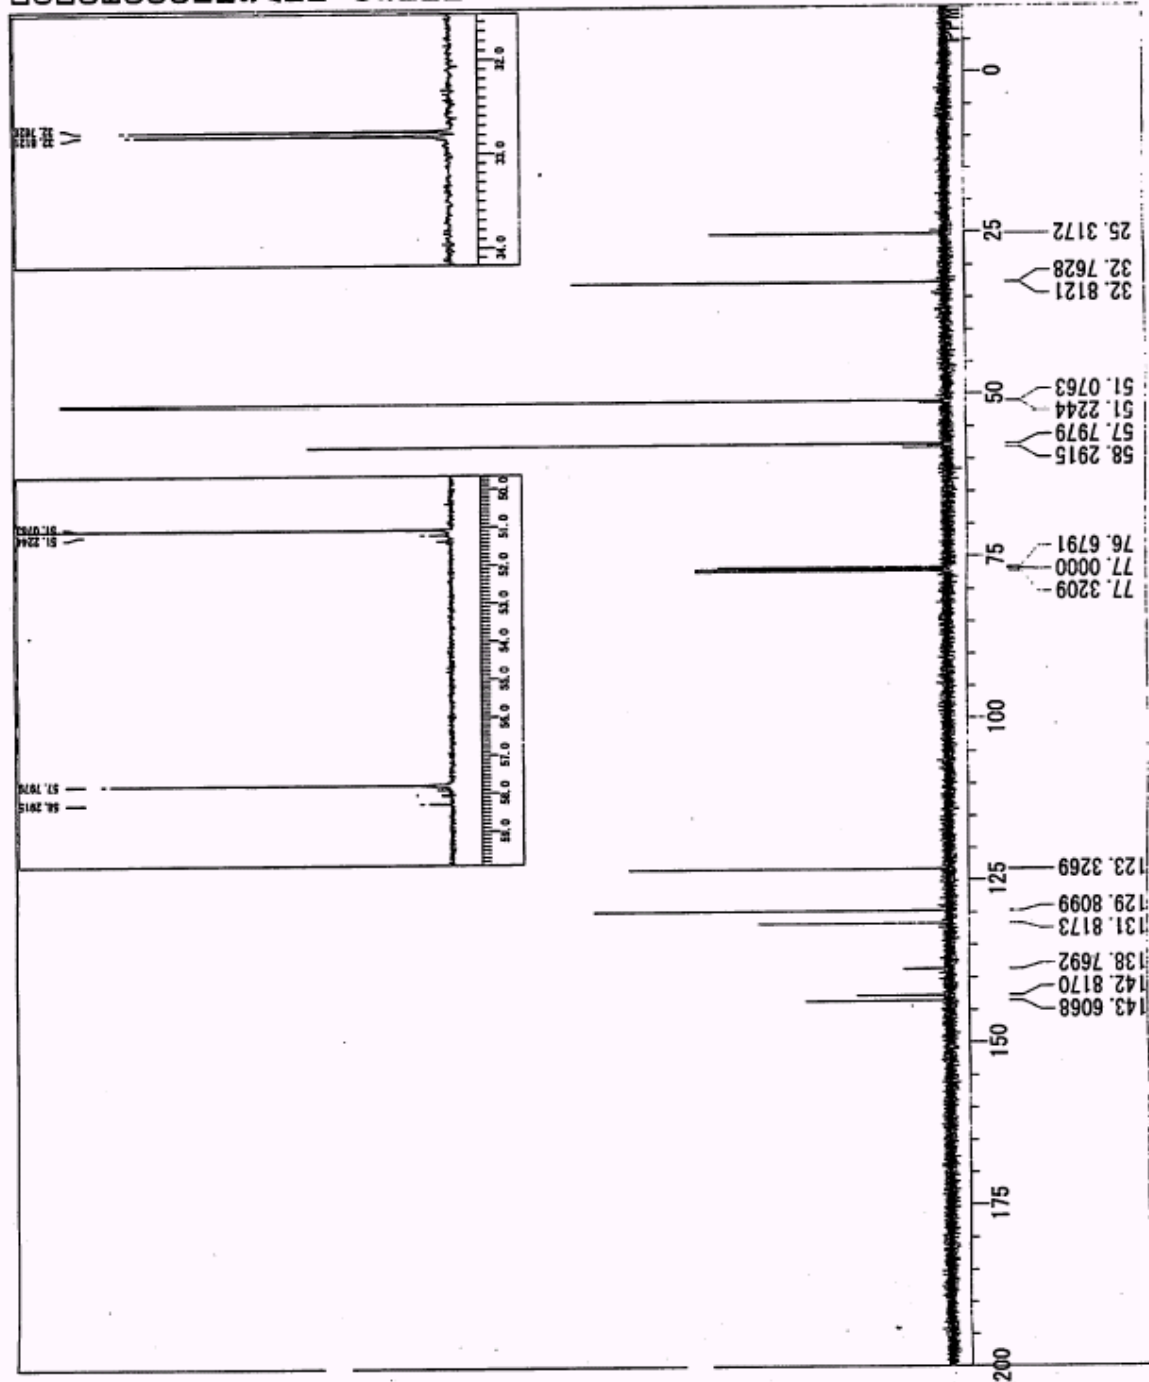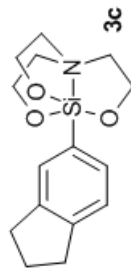



C:\W1\inLambda\COMMON\DEFAULT.AL:

DFILE  
COMNT  
DATIM  
OBNUC  
EXMOD  
OBFRO  
OBSST  
OBFIN  
POINT  
FREQU  
SCANS  
ACQTM  
PD  
PWI  
IRNUC  
CTEMP  
SLVNT  
EXREF  
BF  
RGAIN

Thu Oct 13 19:33:15 2005

1H

non

399.65 MHz

0.00 KHz

134300.00 Hz

16384

7993.60 Hz

16

2.0496 sec

4.9504 sec

6.00 usec

1H

CDCL3

24.8 c

0.00 ppm

0.00 Hz

18

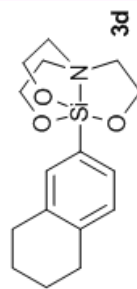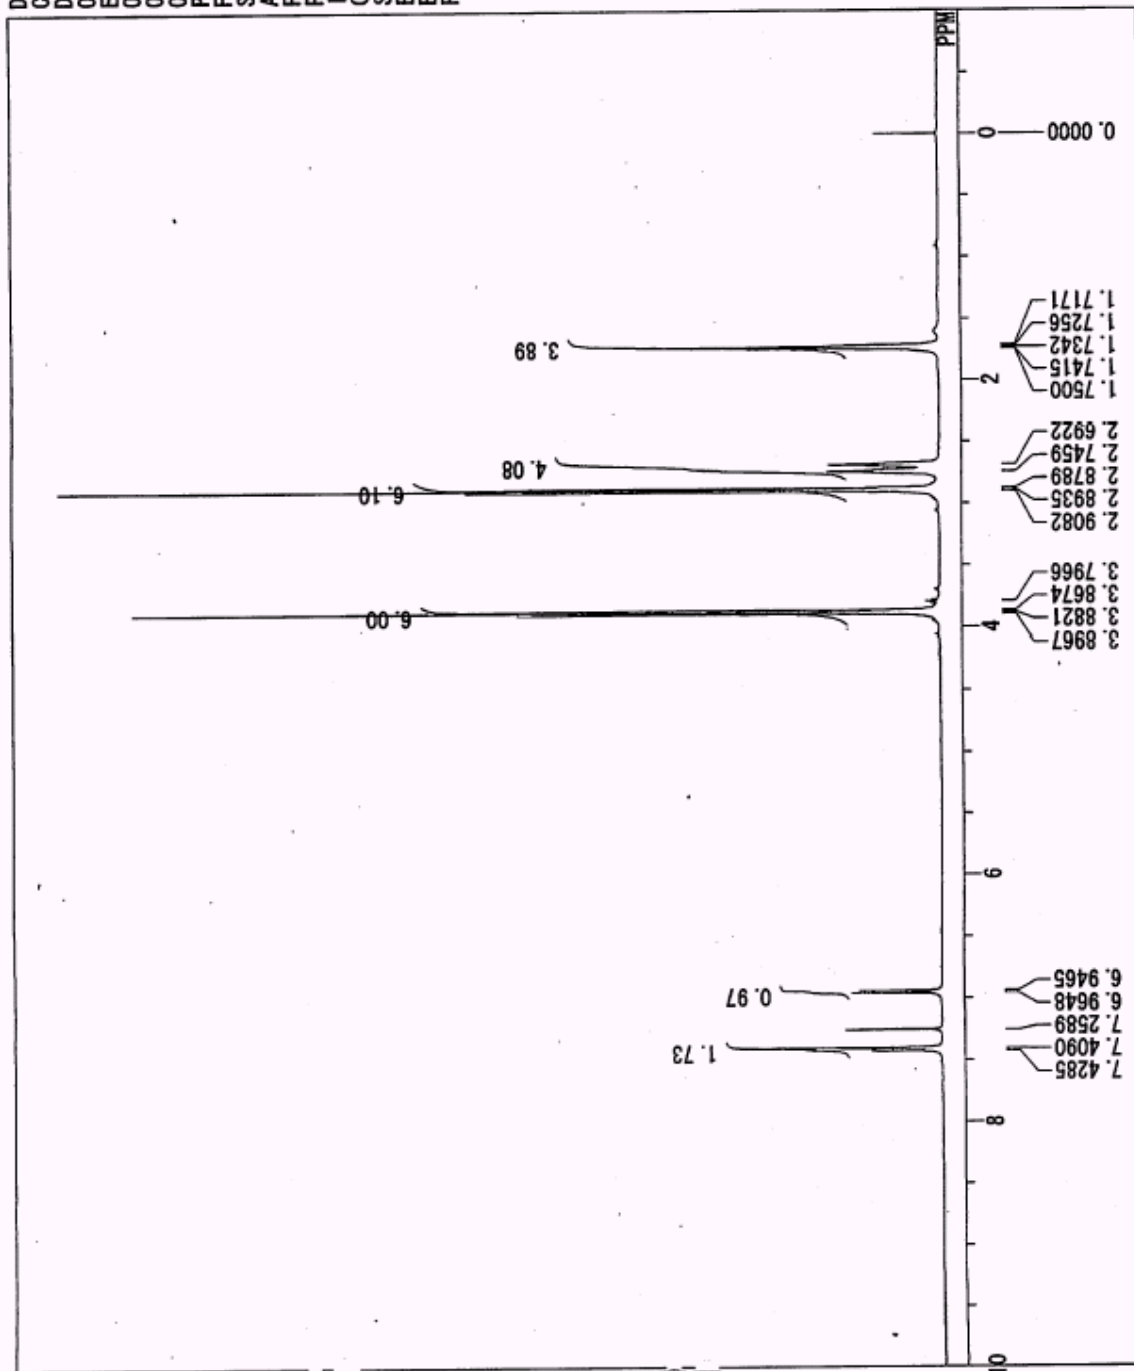

DFILE C:\Documents and Settings\lambdi

CCMINT  
DATIN  
OBNUC 13C  
EXMDD  
OBFREQ  
OBFSET  
OBFIN  
POINT  
FREQ  
SCANS  
ACQTH  
PD  
PWI  
IRNUC 1H  
CTEMP  
SLVNT  
EXREF  
BF  
RGAIN

Thu Oct 13 20:05:49 2005

13C  
bcm  
100.40 MHz  
0.00 KHz  
135500.00 Hz  
32768  
27100.27 Hz  
512  
1.2091 sec  
1.7909 sec  
4.50 usec  
26.2 c  
CDCL3  
77.00 ppm  
0.00 Hz  
29

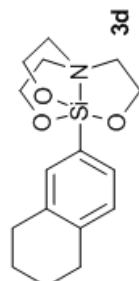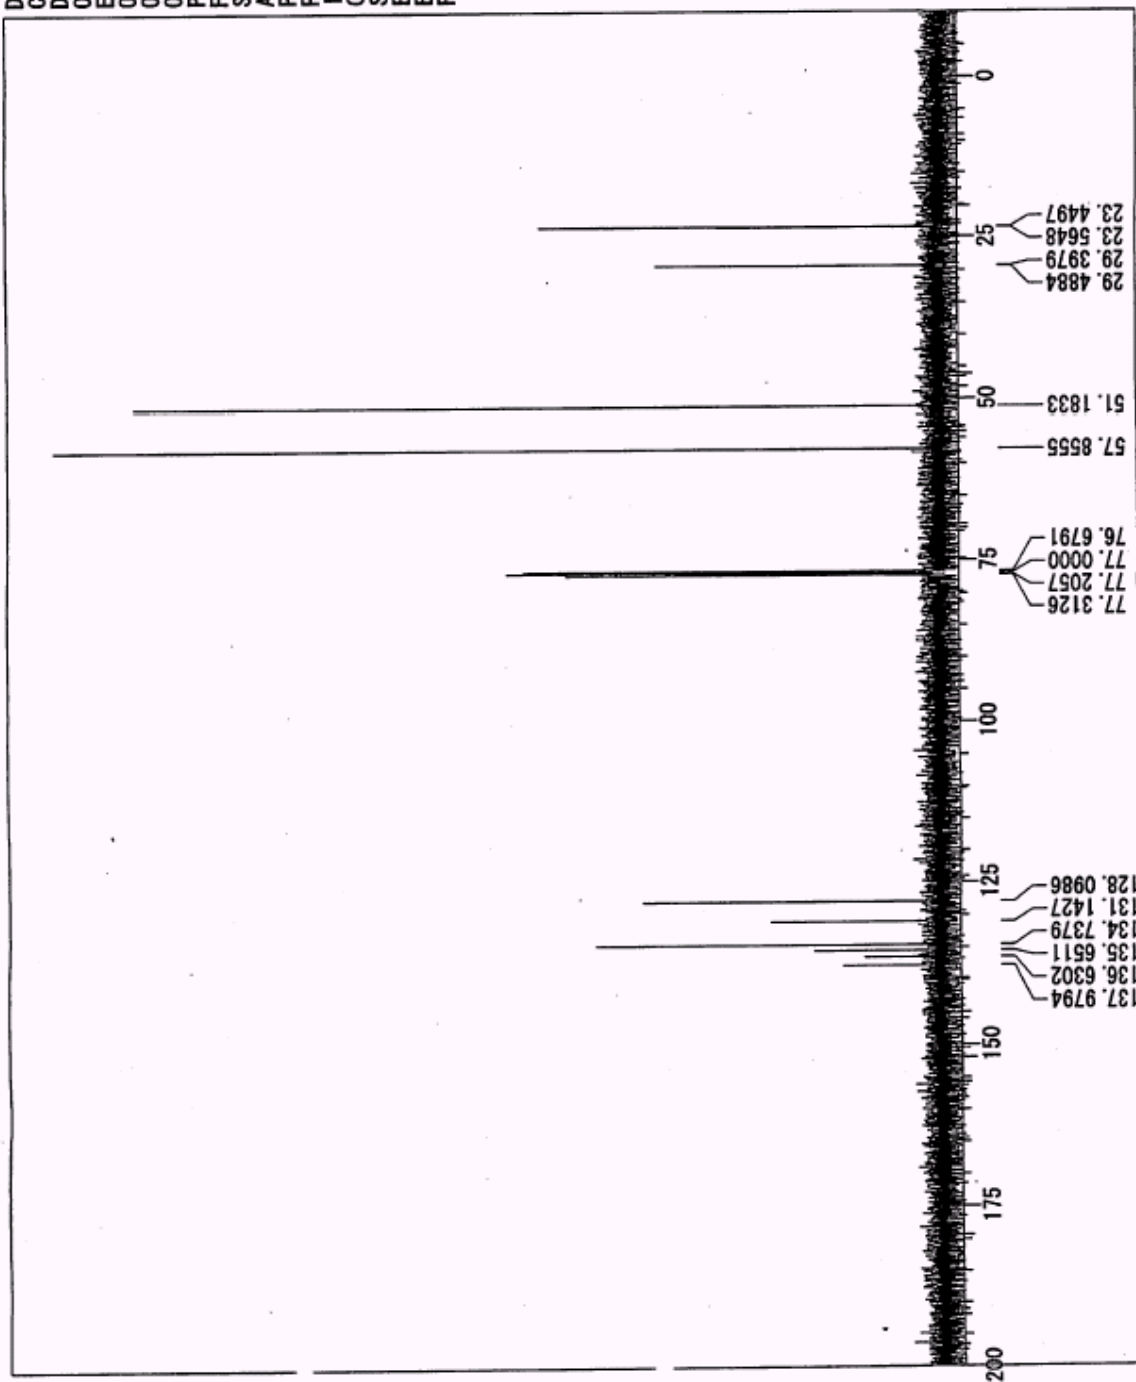

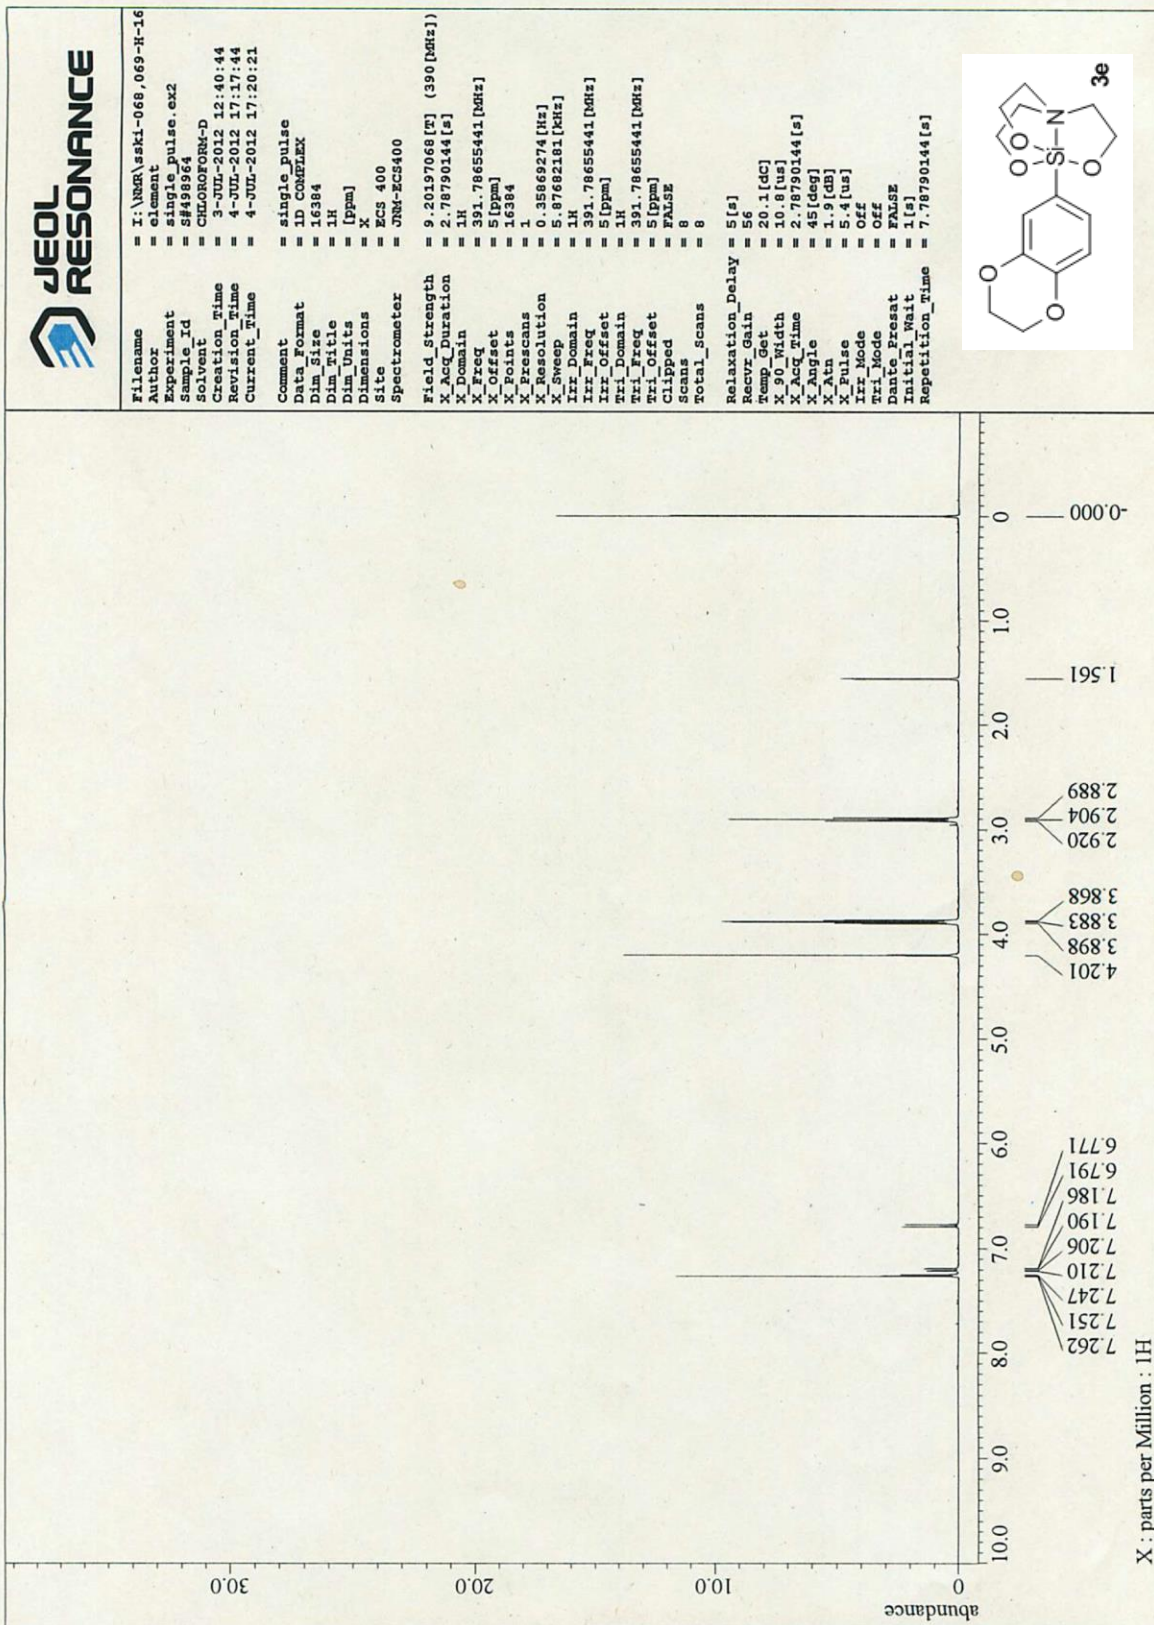



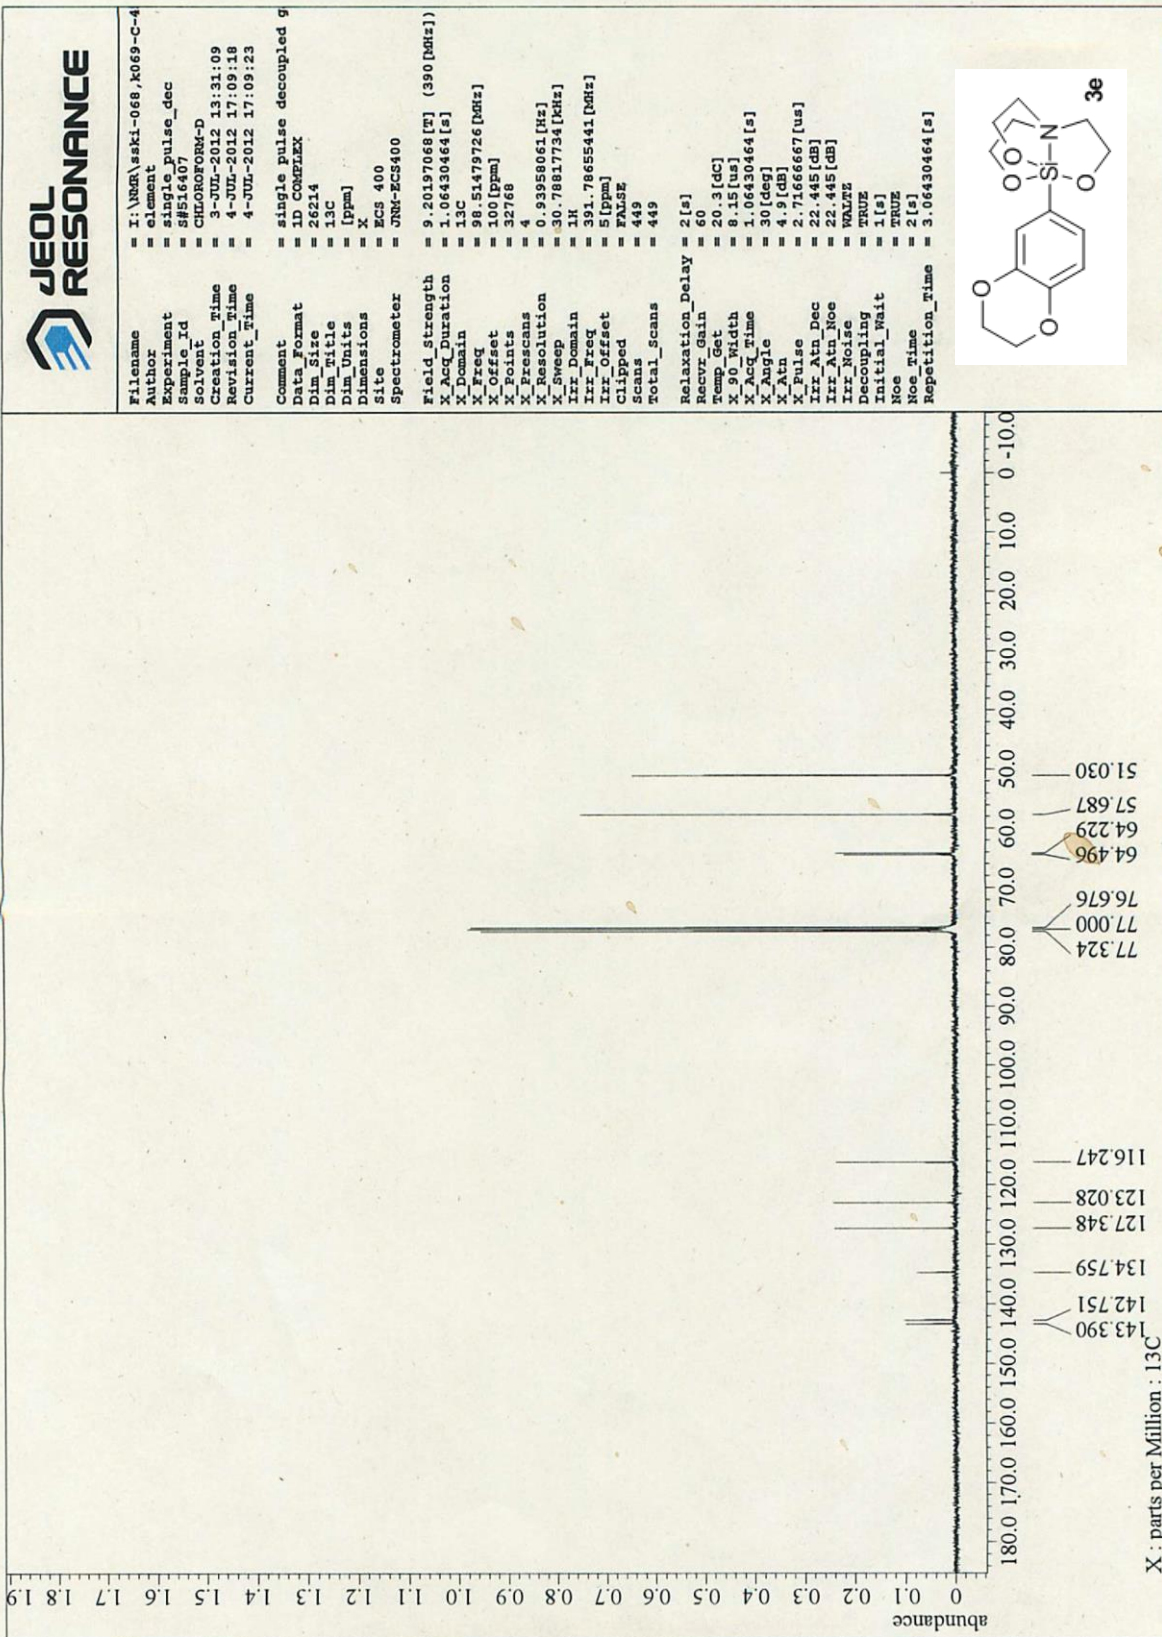



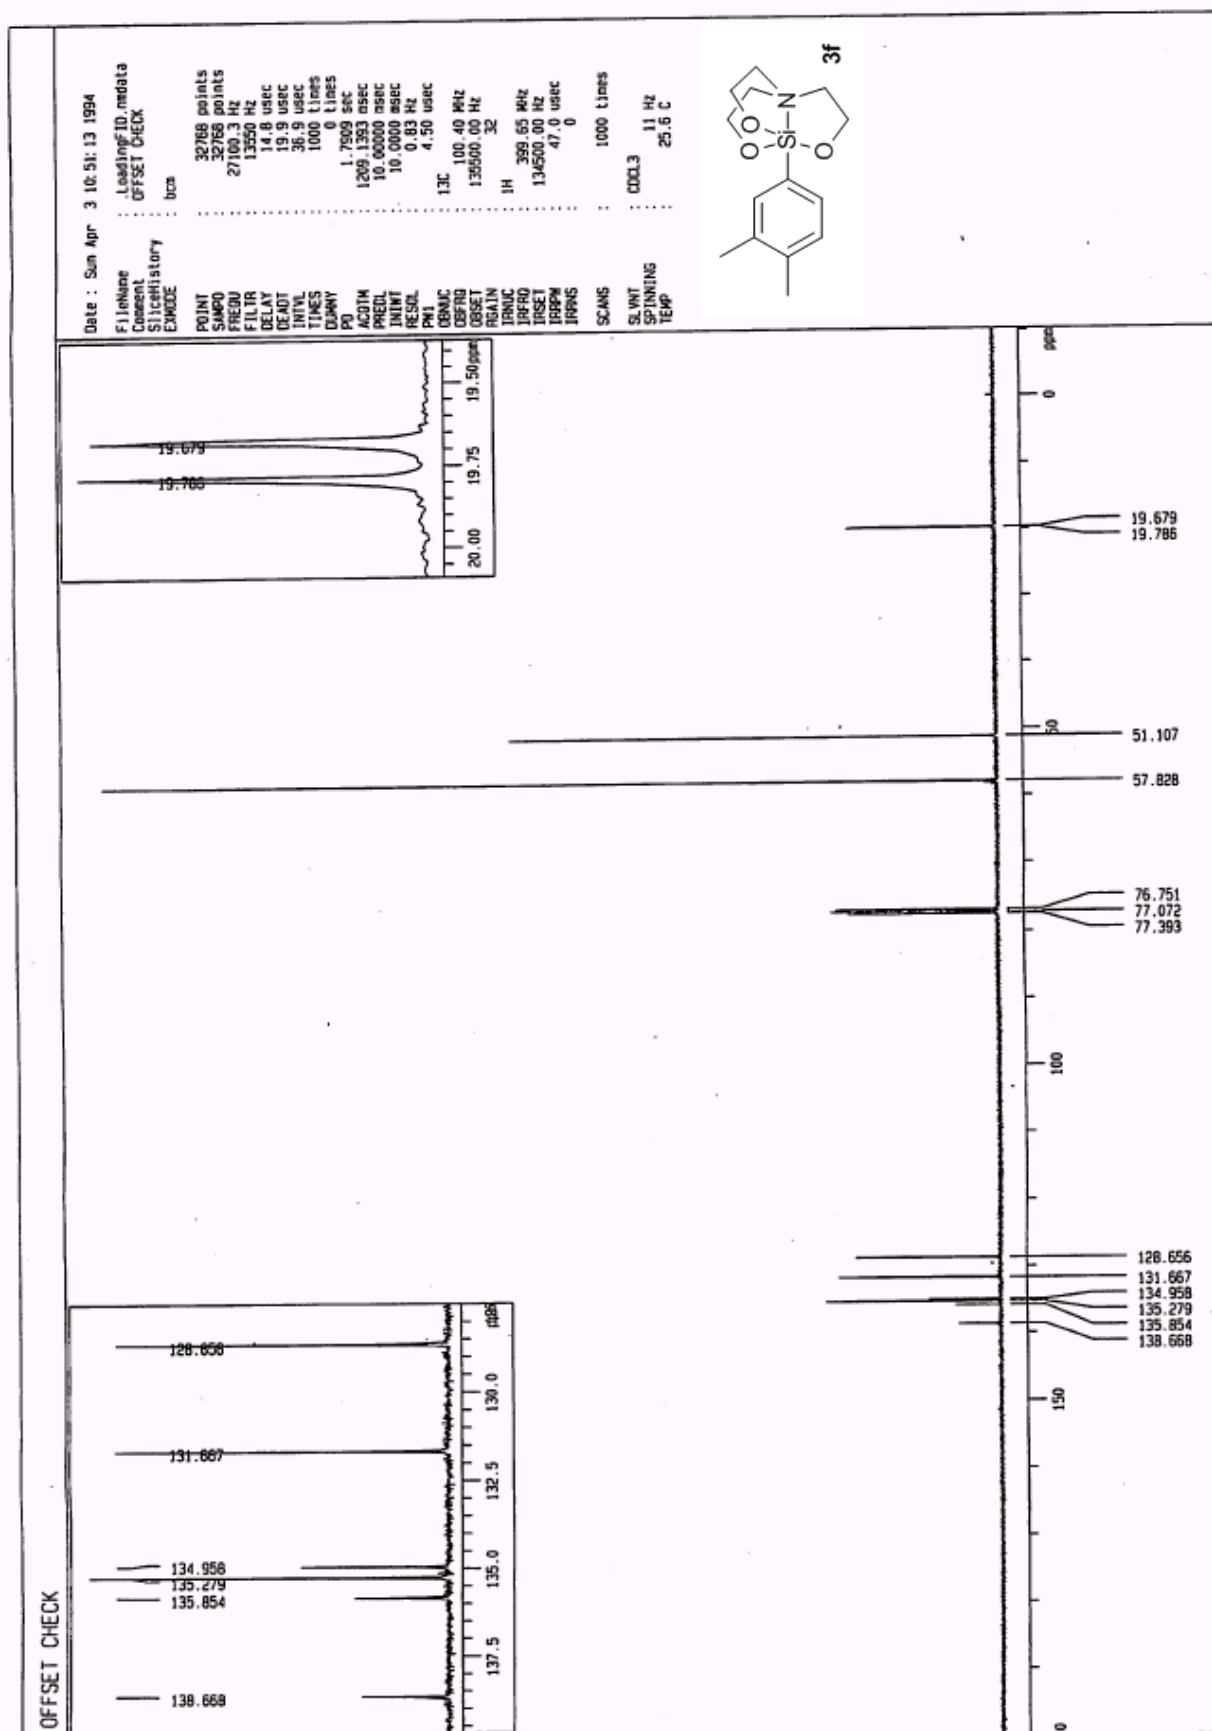

DFILE C:\Documents and Settings\lambdr

CONVT  
DATIM Fri Dec 09 13:15:37 2005  
OBNUC 1H  
EXMOD non  
OBFRQ 399.65 MHz  
OBSET 0.00 KHz  
OBFIN 134300.00 Hz  
POINT 16384  
FREQU 7993.60 Hz  
SCANS 16  
ACQTM 2.0496 sec  
PD 4.9504 sec  
PWI 6.00 usec  
IRNUC 1H  
CTEMP 25.0 c  
SLVNT CDCL3  
EXREF 0.00 ppm  
BF 0.12 Hz  
RGAIN 18

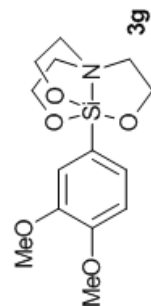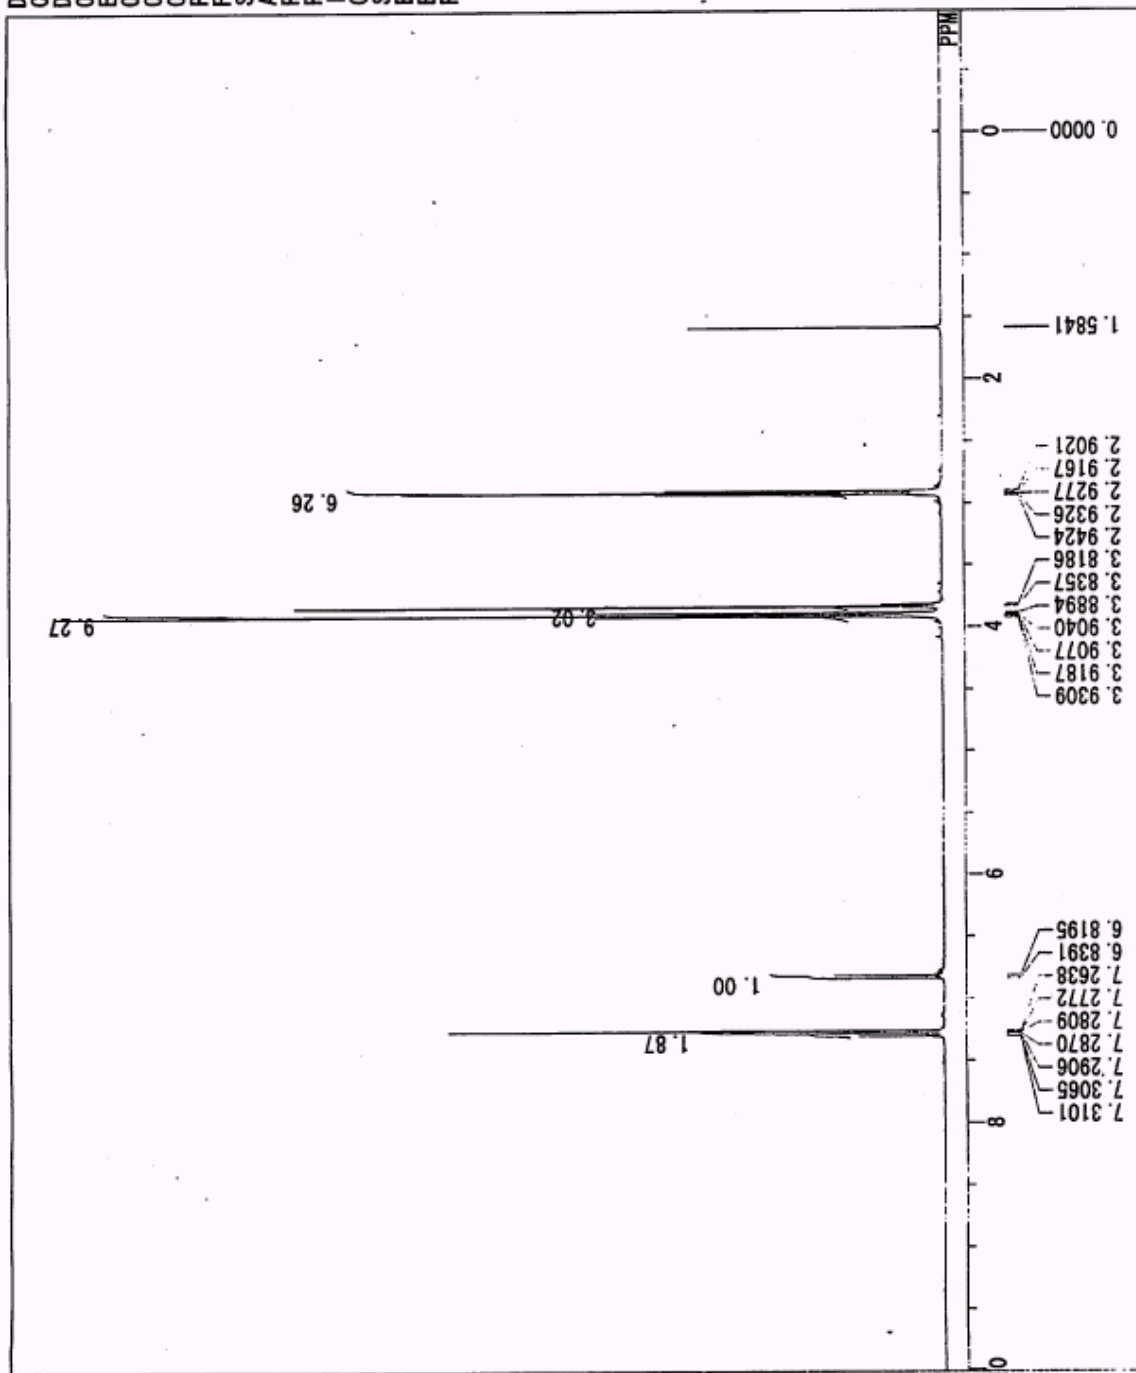

DF1LE C:\P\inl\lambdambda\COMMON\DEFAULT.T.AL

COMNT  
DATIM Fri Dec 09 14:08:01 2005  
OBNUC 13C  
EXMOD bcm  
OBFRQ 100.40 MHz  
OBSET 0.00 KHz  
OBFTN 135500.00 Hz  
POINT 32768  
FREQU 27100.27 Hz  
SCANS 1024  
ACQTH 1.2091 sec  
PD 1.7909 sec  
PHI 4.50 usec  
IRNUC 1H  
GTEMP 25.5 c  
SLVNT CDCL3  
EXREF 77.00 ppm  
BF 0.12 Hz  
RGAIN 30

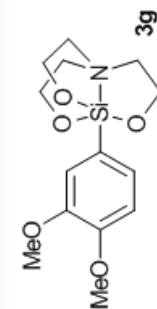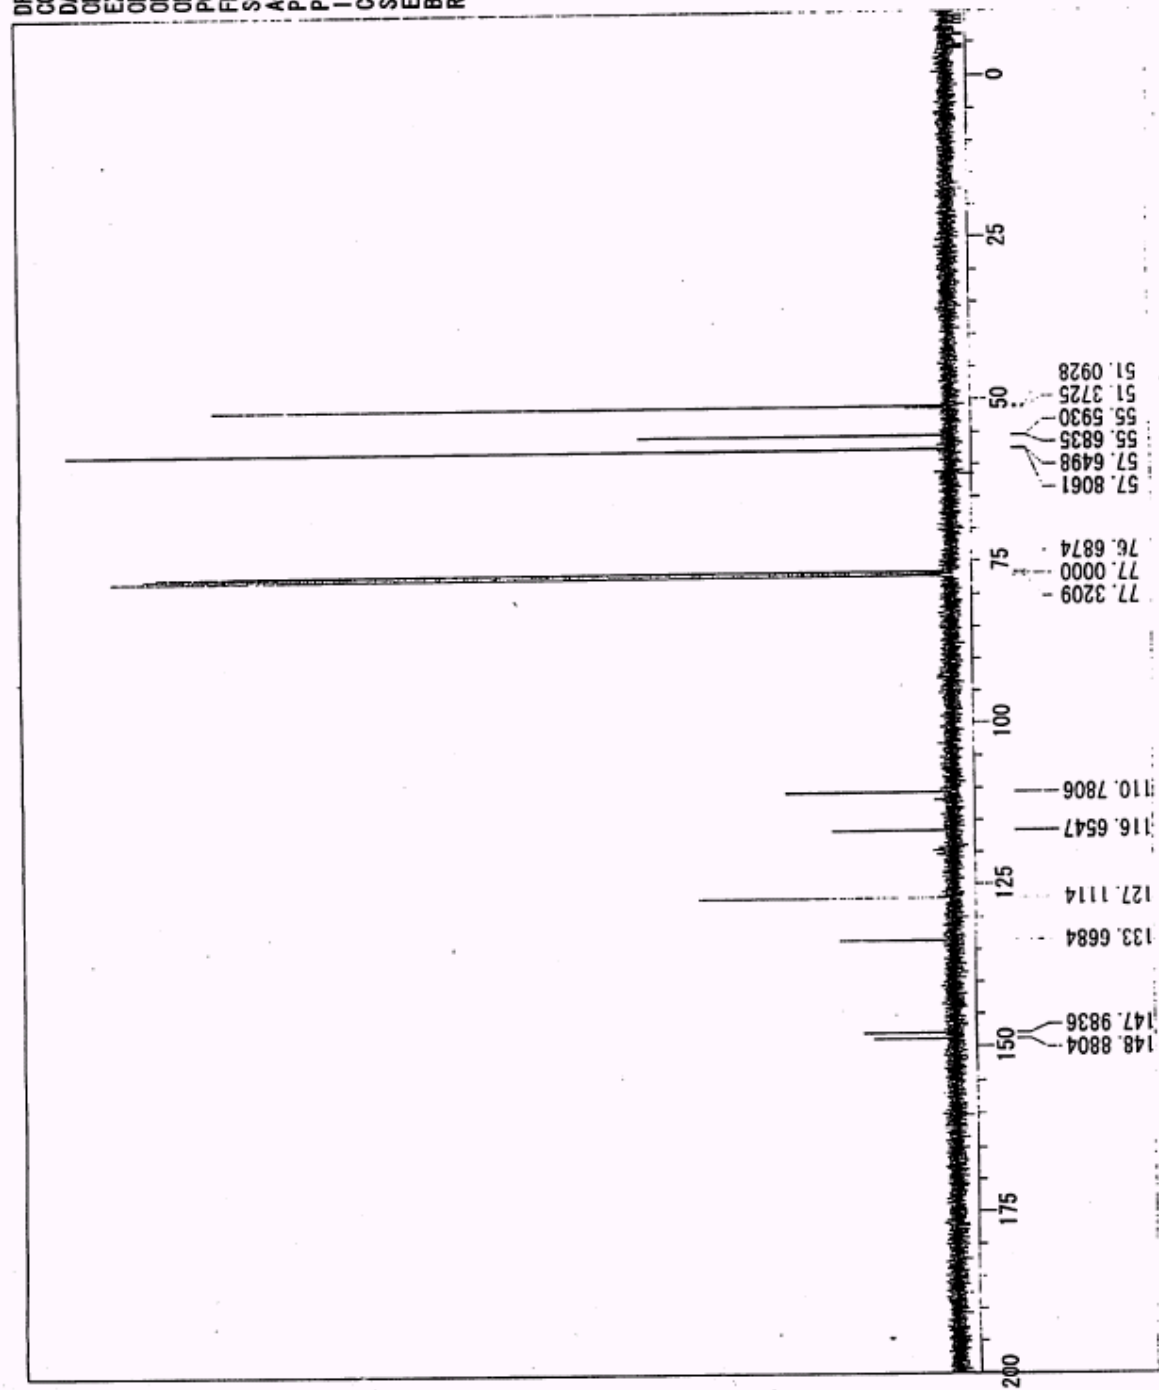



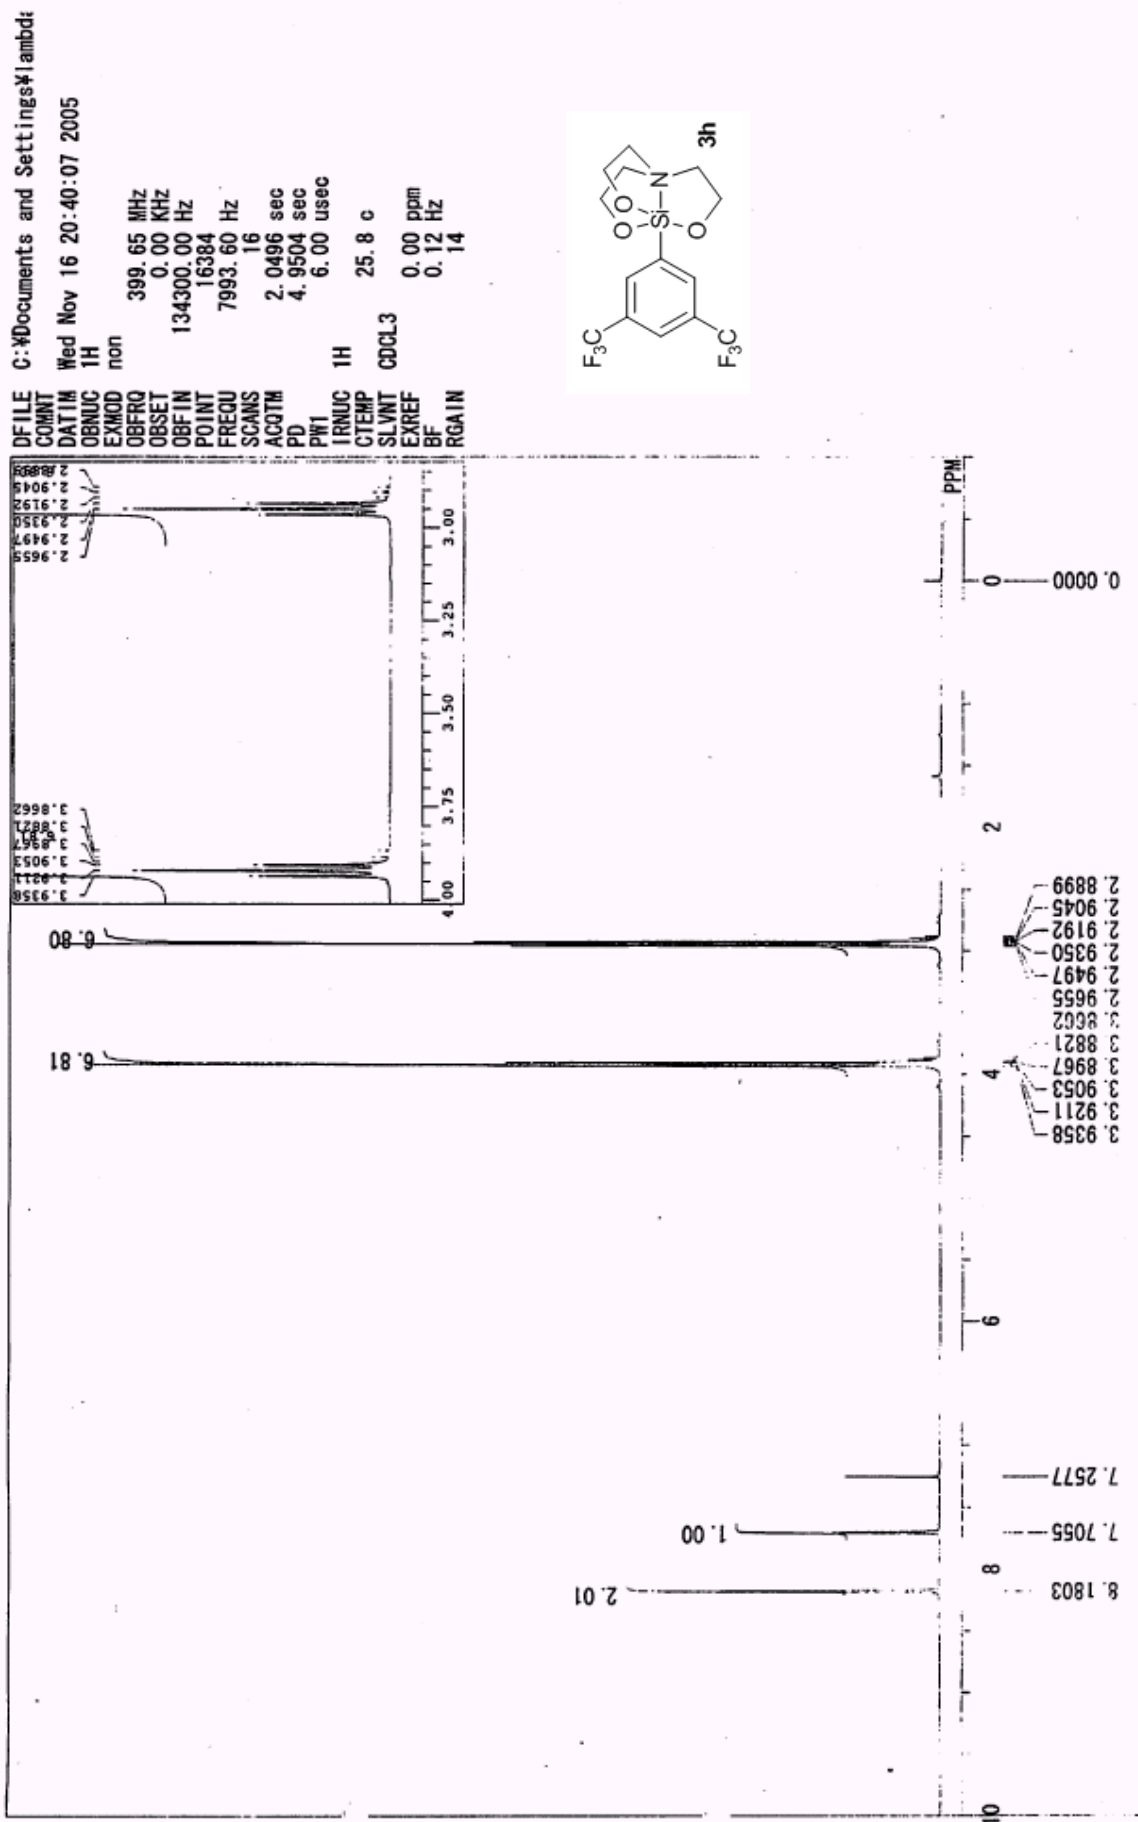

DF ILE E:\biscf3sillatrac.c ALS  
COMNT Wed Nov 16 21:06:42 2005  
DATIM 13C  
OBNUC bom  
EXMOD 100.40 MHz  
OBFRQ 0.00 KHz  
OBSET 135500.00 Hz  
OBFIN 32768  
POINT 27100.27 Hz  
FREQU 512  
SCANS 1.2091 sec  
ACQTM 1.7909 sec  
PD 4.50 usec  
PHI 1H  
IRNUC 26.6 C  
CTEMP CDCL3  
SLVNT 77.00 ppm  
EXREF 0.12 Hz  
BF 30  
RGAIN

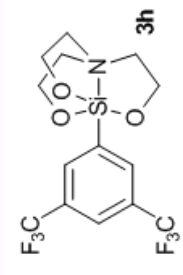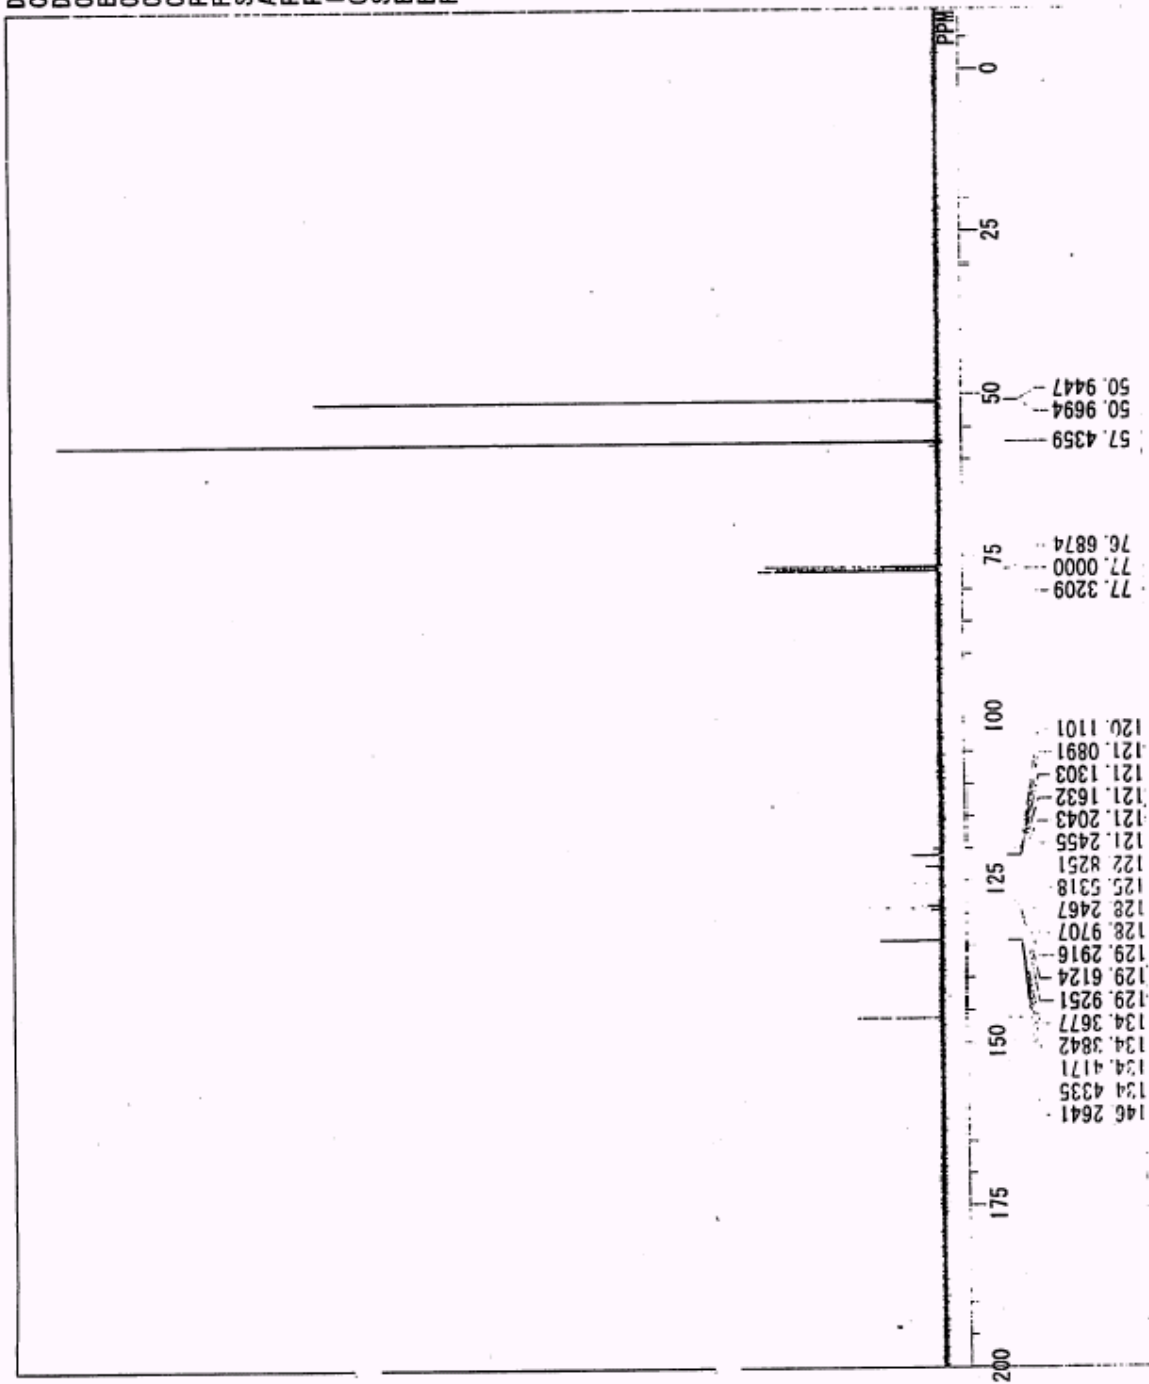

DFILE E:\13diclsilatrane-H. ALS  
COMMT  
DATIM Fri Aug 19 18:39:19 2005  
OBNUC 1H  
EXMOD non  
OBFRQ 399.65 MHz  
OBSET 0.00 kHz  
OBFIN 134300.00 Hz  
POINT 16384  
FREQU 7993.60 Hz  
SCANS 16  
ACQTM 2.0496 sec  
PD 4.9504 sec  
PWT 6.00 usec  
IRNUC 1H  
CTEMP 23.8 C  
SLVNT CDCL3  
EXREF 0.00 ppm  
BF 0.12 Hz  
RGAIN 18

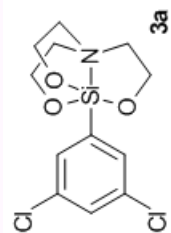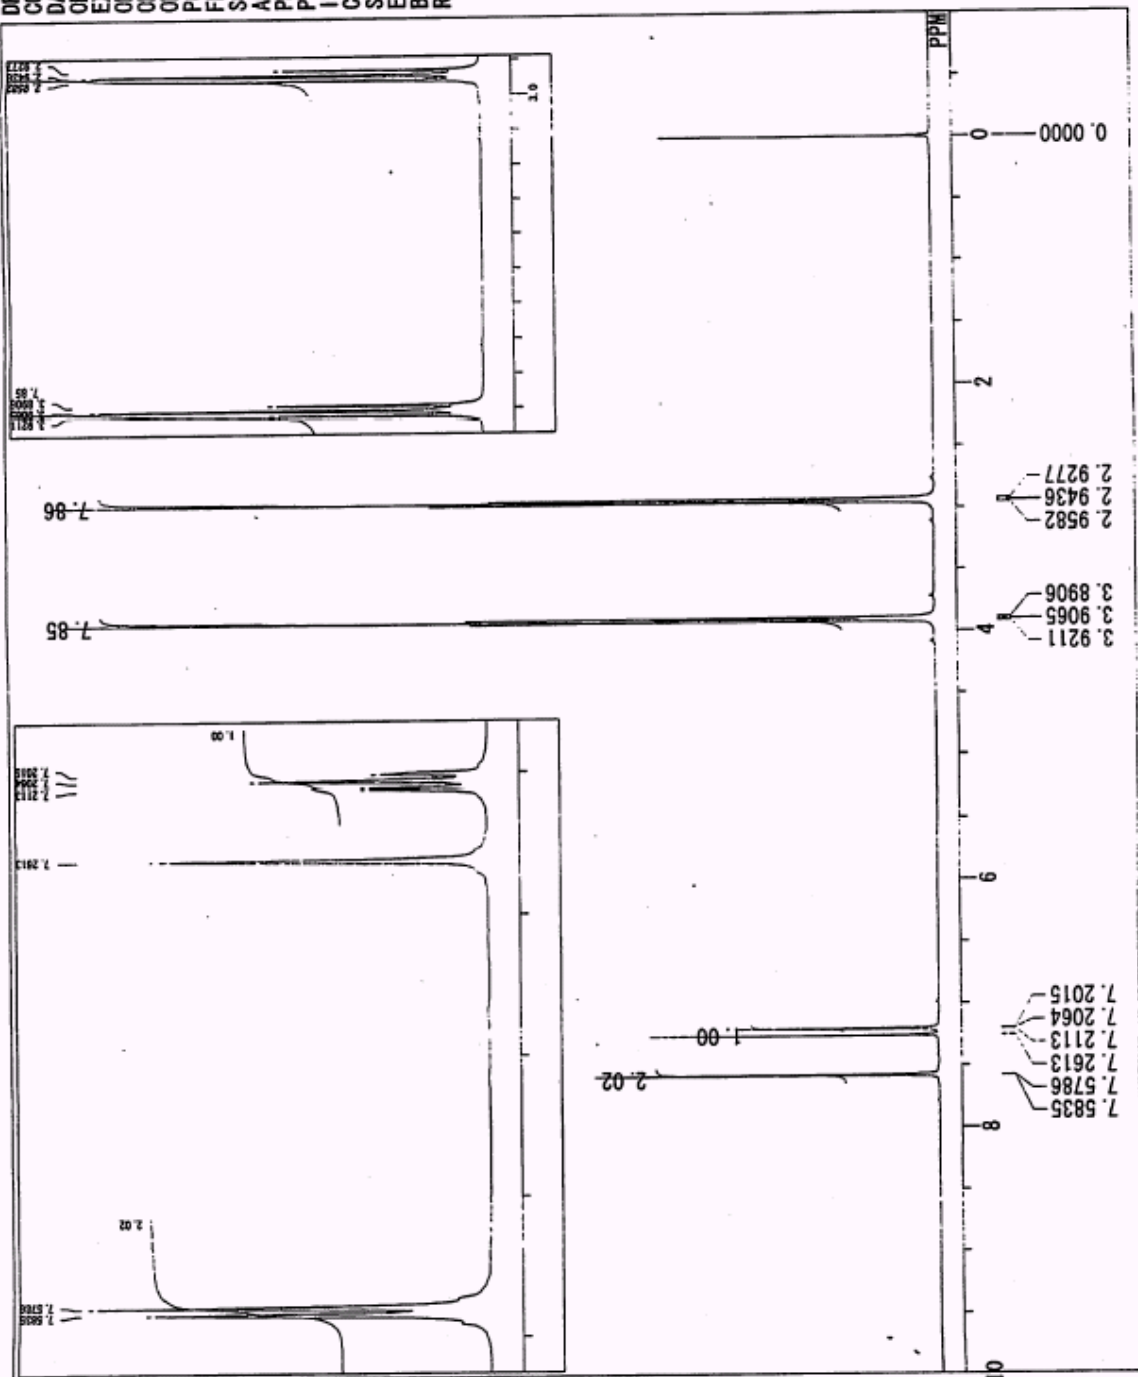

DFILE E:\13diclsilatrane-C. ALS  
COMINT  
DATIM Fri Aug 19 19:06:31 2005  
OBNUC 13C  
EXMOD bcm  
OBFRQ 100.40 MHz  
OBSET 0.00 KHz  
OBFIN 135500.00 Hz  
POINT 32768  
FREQU 27100.27 Hz  
SCANS 512  
ACQTM 1.2091 sec  
PD 1.7909 sec  
PWI 4.50 usec  
IRNUC 1H  
CTEMP 24.7 c  
SLVNT CDCL3  
EXREF 77.00 ppm  
BF 0.12 Hz  
RGAIN 30

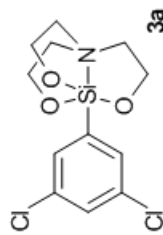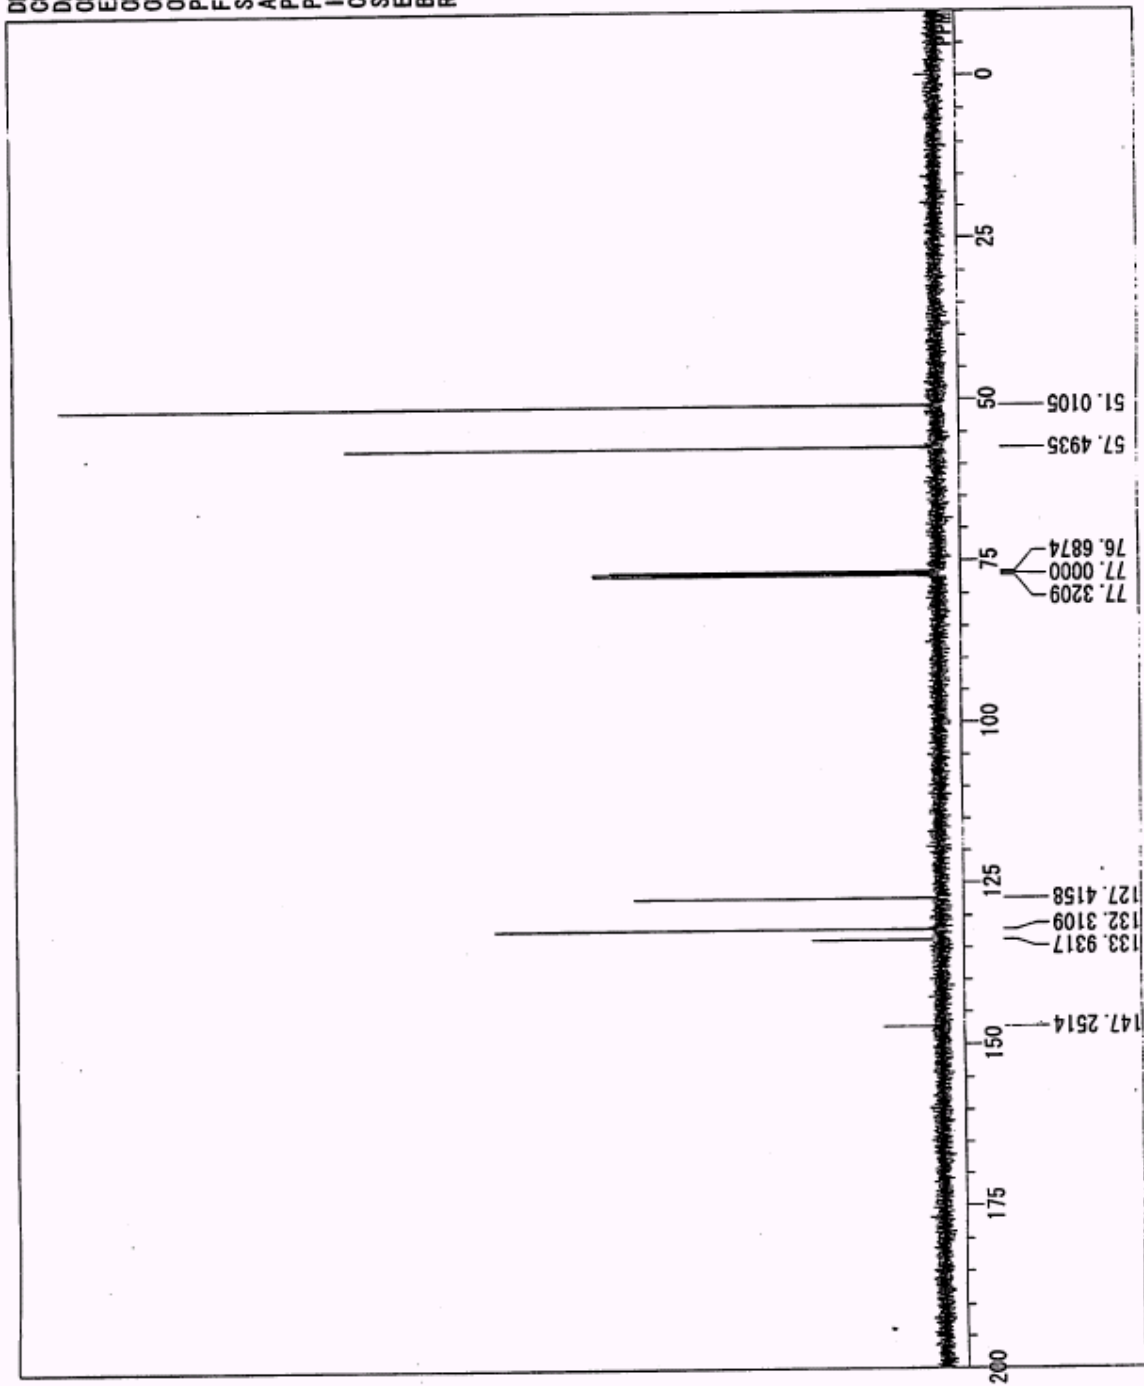

C:\P\inl\lambdambda\COMMON\DEFAULT.T.AL

DFILE CONNT  
DATIM Wed Sep 28 20:07:27 2005  
OBNUC 1H  
EXMOD non  
OBFRQ 399.65 MHz  
OBSET 0.00 KHz  
OBFIN 134300.00 Hz  
POINT 16384  
FREQU 7993.60 Hz  
SCANS 16  
ACQTH 2.0496 sec  
PD 4.9504 sec  
PWI 6.00 usec  
IRNUC 1H  
CTEMP 25.0 c  
SLVNT CDCL3  
EXREF 0.00 ppm  
BF 0.12 Hz  
RGAIN 16

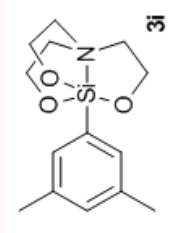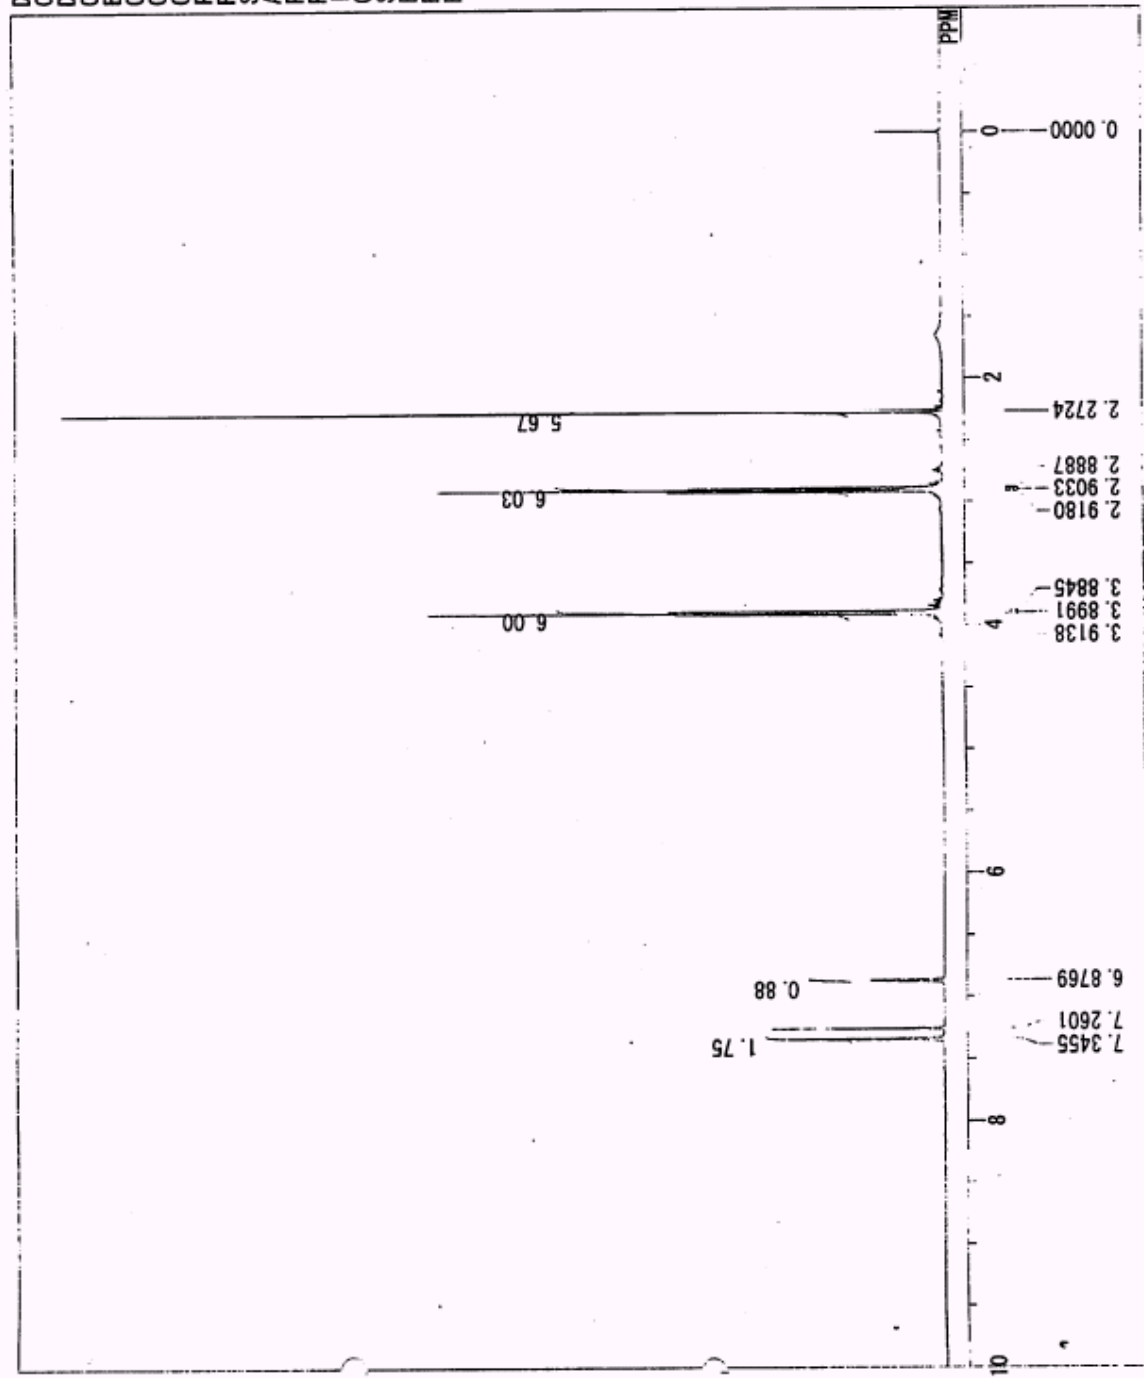

C:\W1\mlambda\COMMONY\_DEFAULT.AL

DFILE  
COMNT  
DATIM  
OBNUC  
EXMOD  
OBFRQ  
OBSET  
OBFIN  
POINT  
FREQU  
SCANS  
ACQTM  
PD  
PWI  
IRNUC  
CTEMP  
SLVNT  
EXREF  
BF  
RGAIN

Wed Sep 28 23:27:27 2005  
13C  
bcm

100.40 MHz  
0.00 KHz  
135500.00 Hz  
32768  
27100.27 Hz  
788  
1.2091 sec  
1.7909 sec  
4.50 usec

1H  
25.8 c  
CDCL3  
77.00 ppm  
1.20 Hz  
30

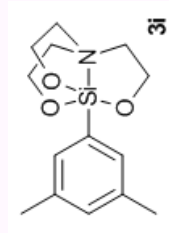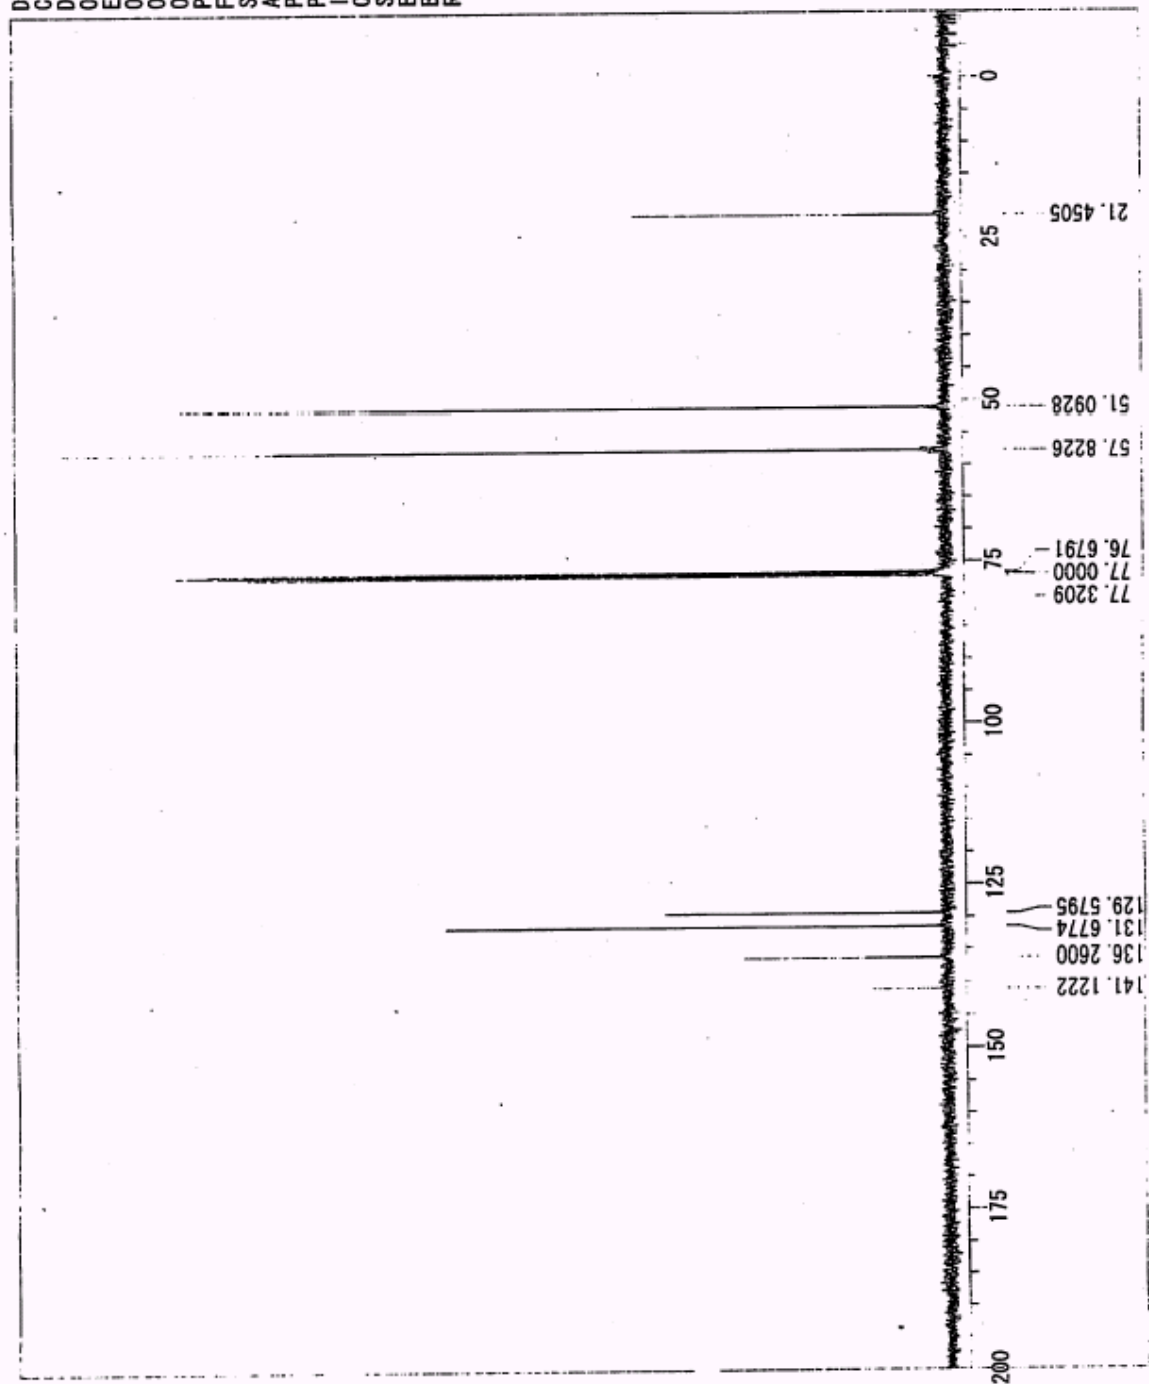

C:\Documents and Settings\lambdi

DFILE  
 COMNT  
 DATIM Thu Dec 08 10:39:29 2005  
 OBNUC 1H  
 EXMOD non  
 OBFRO 399.65 MHz  
 OBSET 0.00 KHz  
 OBFIN 134300.00 Hz  
 POINT 16384  
 FREQU 7993.60 Hz  
 SCANS 16  
 ACQTH 2.0496 sec  
 PD 4.9504 sec  
 PW1 6.00 usec  
 TRNUC 1H  
 CTEMP 25.5 C  
 SLVNT CDCL3  
 EXREF 0.00 ppm  
 BF 0.12 Hz  
 RGAIN 12

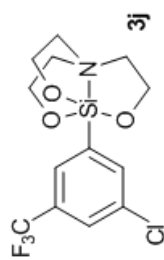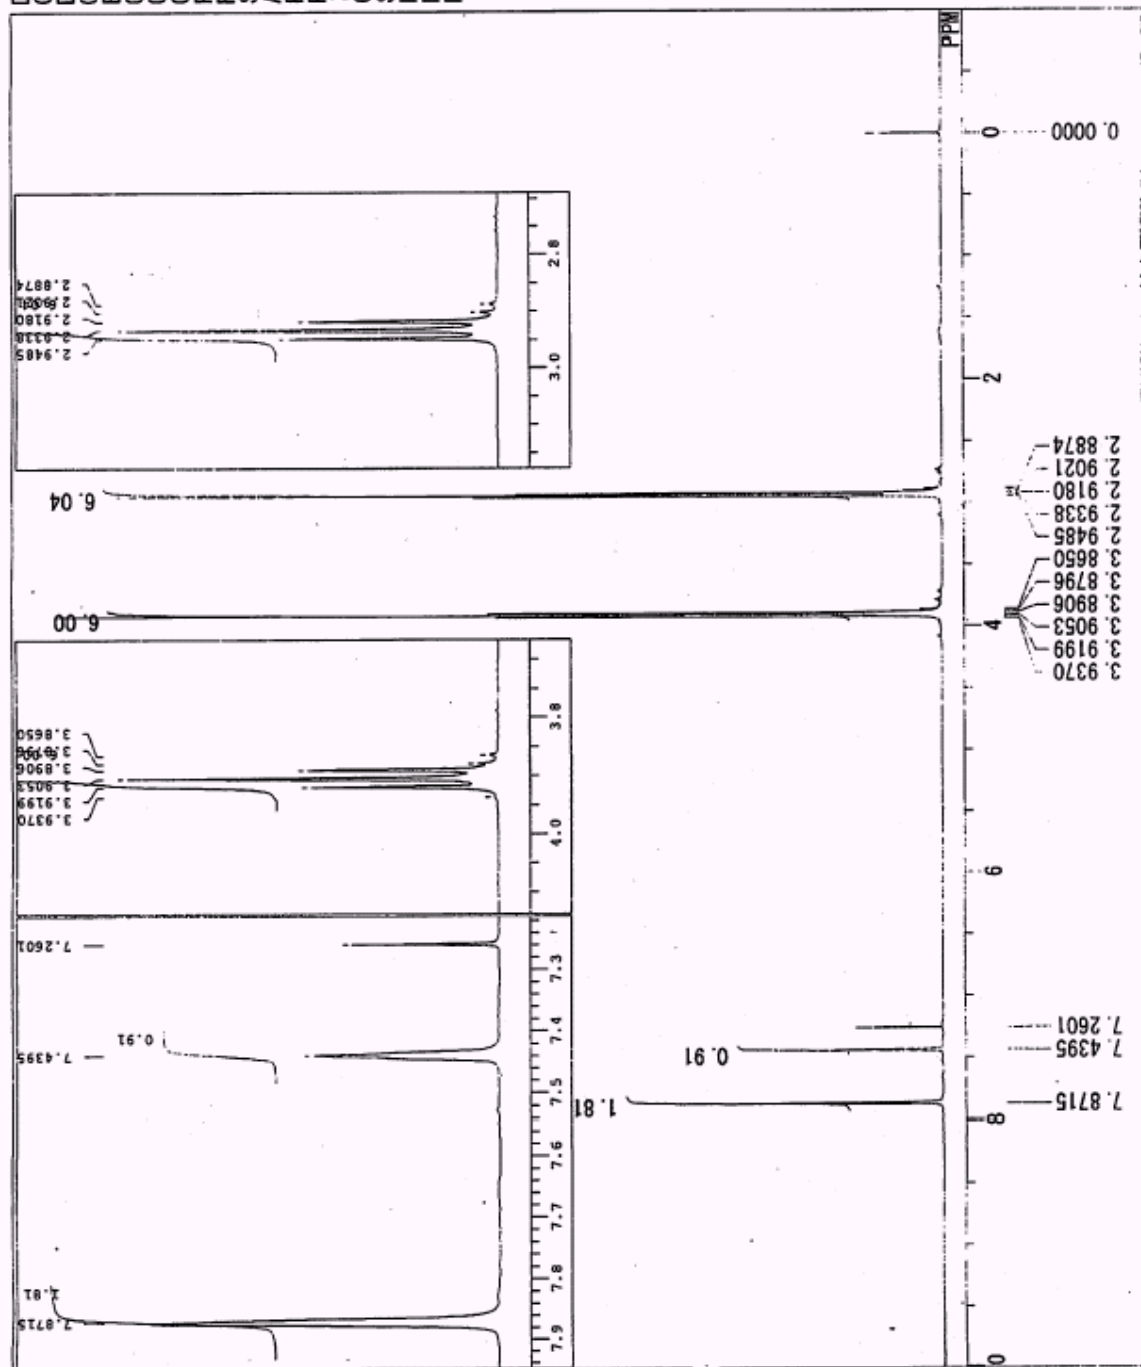

C:\Documents and Settings\lambdi

DFILE  
COMINT  
DAT1M  
OBNUC  
EXMOD  
OBFRQ  
OBSET  
OBF IN  
POINT  
FREQU  
SCANS  
ACQTH  
PD  
PHT  
IRNUC  
GTEMP  
SLVNT  
EXREF  
BF  
RGAIN

Thu Dec 08 15:40:55 2005  
13C  
bcm  
100.40 MHz  
0.00 KHz  
135500.00 Hz  
32768  
27100.27 Hz  
1024  
1.2091 sec  
1.7909 sec  
4.50 usec  
1H  
26.3 C  
CDCL3  
77.00 ppm  
0.12 Hz  
29

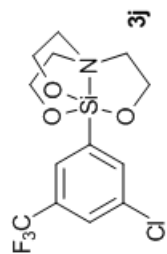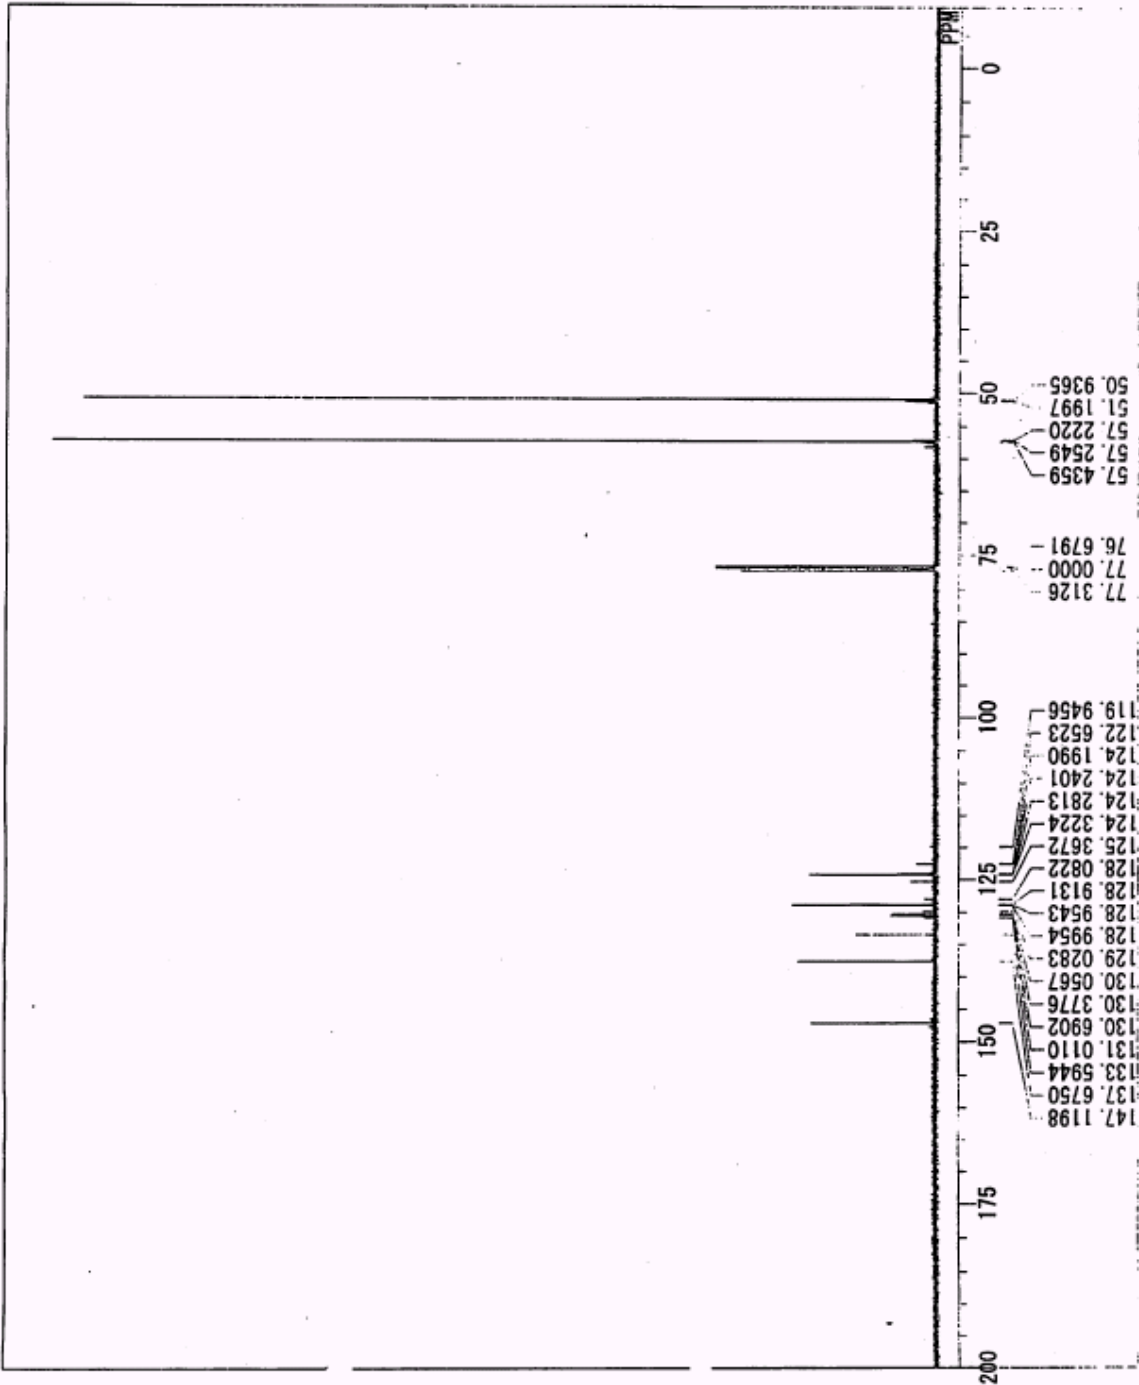



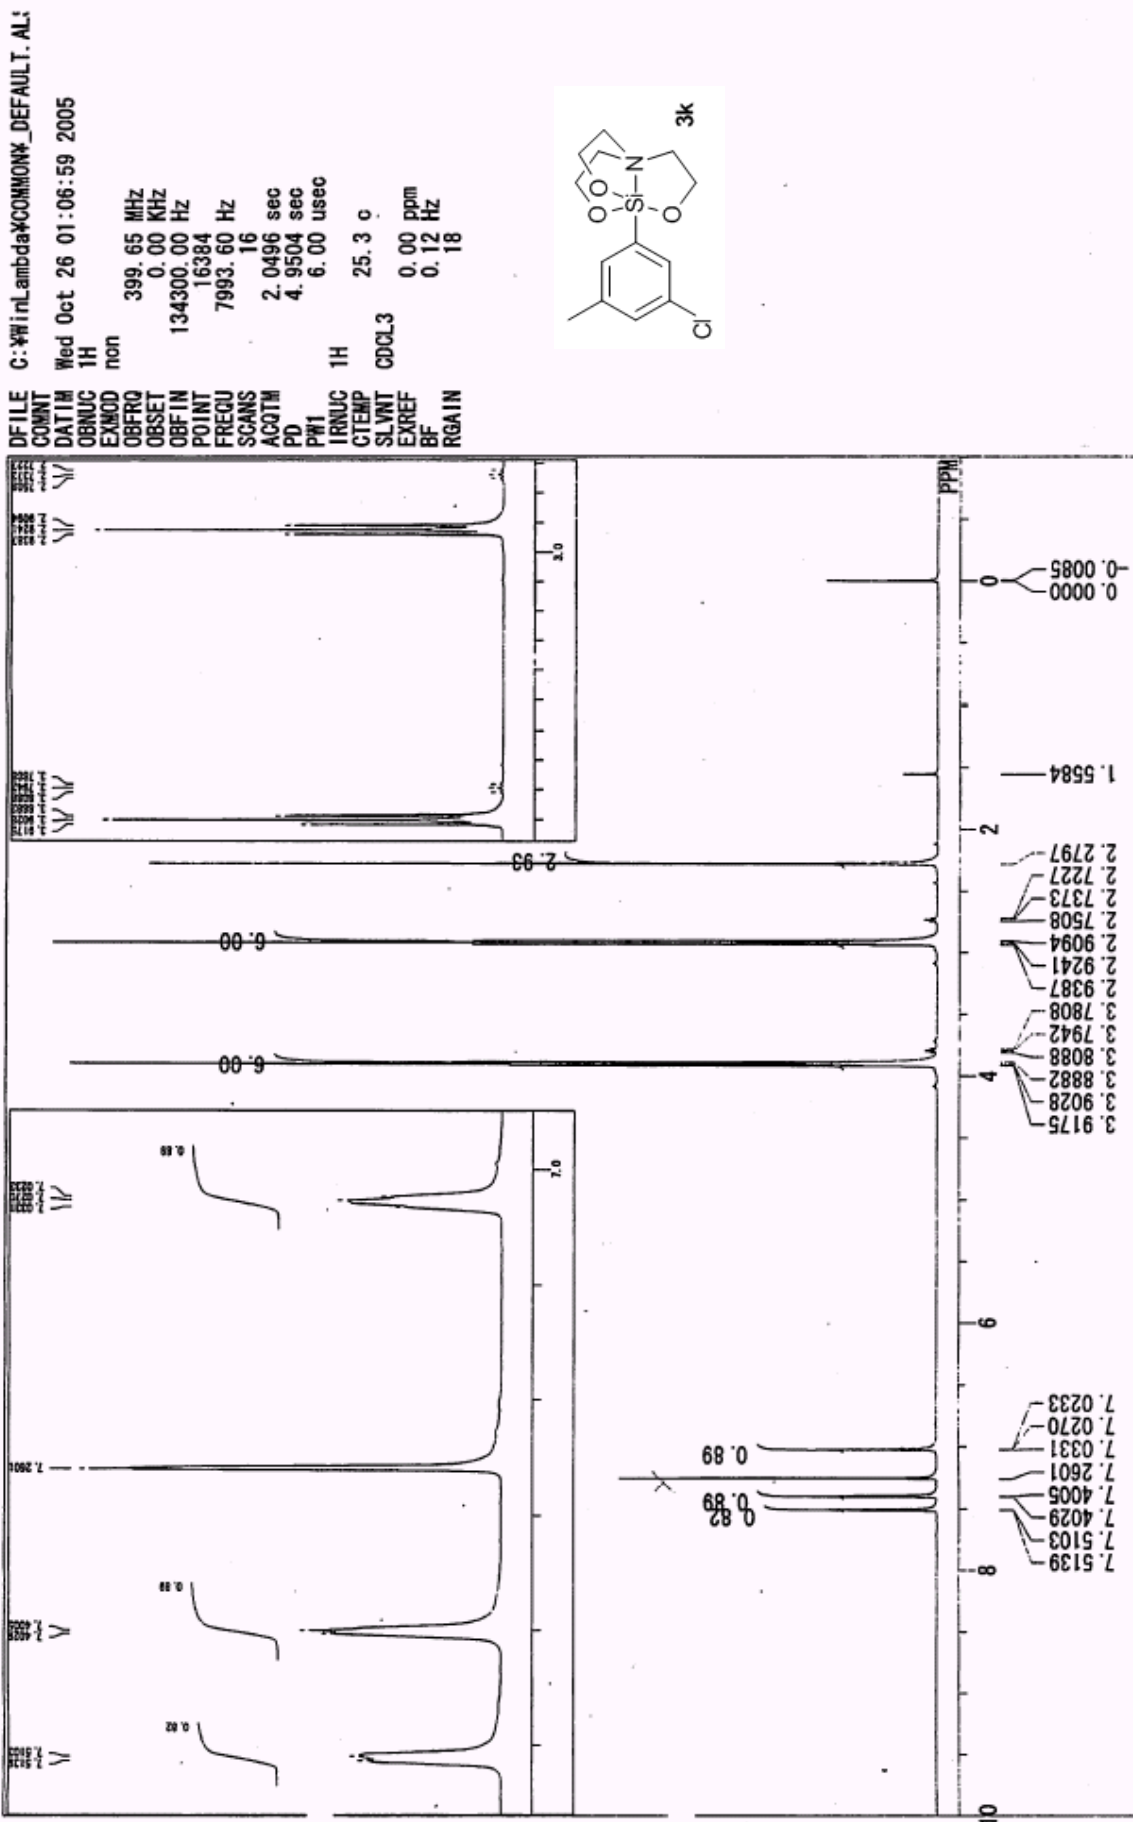

C:\Documents and Settings\lambdambda

DFILE  
COMNT  
DATIN  
OBNUC  
EXMOD  
OBFRO  
OBSET  
OBFIN  
POINT  
FREQU  
SCANS  
ACQTM  
PD  
PW1  
IRNUC  
CTEMP  
SLVNT  
EXREF  
BF  
RGAIN

Tue Oct 25 23:16:52 2005

13C

bcm

100.40 MHz  
0.00 KHz  
135500.00 Hz  
32768  
27100.27 Hz  
258  
1.2091 sec  
1.7909 sec  
4.50 usec  
1H  
26.2 °C  
CDCL3  
77.00 ppm  
0.12 Hz  
29

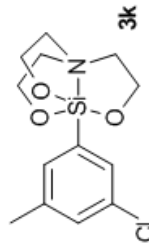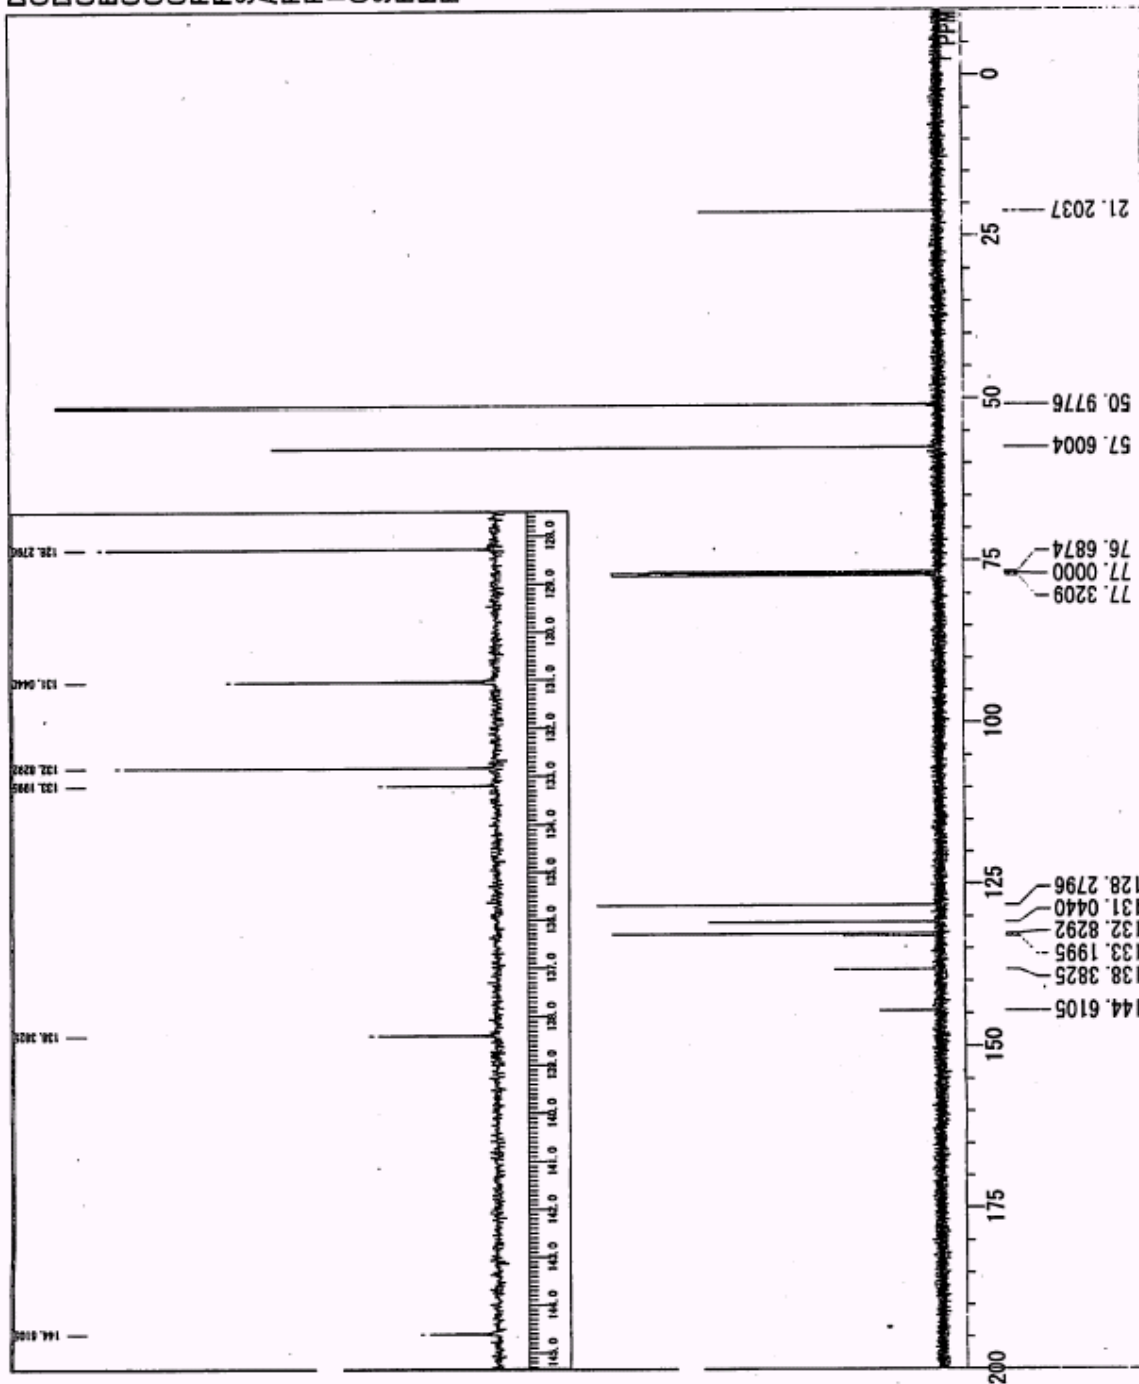

C:\Documents and Settings\lambdt

DFILE COMINT  
DATIM Thu Feb 09 10:35:23 2006  
OBNUC 1H  
EXMOD non  
OBFRQ 399.65 MHz  
OBSET 0.00 KHz  
OBFIN 134300.00 Hz  
POINT 16384  
FREQU 7993.60 Hz  
SCANS 16  
ACQTM 2.0496 sec  
PD 4.9504 sec  
PRT 6.00 usec  
IRNUC 1H  
GTEMP 25.0 °C  
SLVNT CDCL3  
EXREF 7.26 ppm  
BF 0.15 Hz  
RGAIN 15

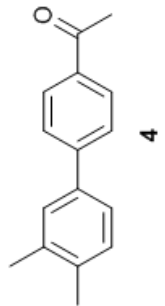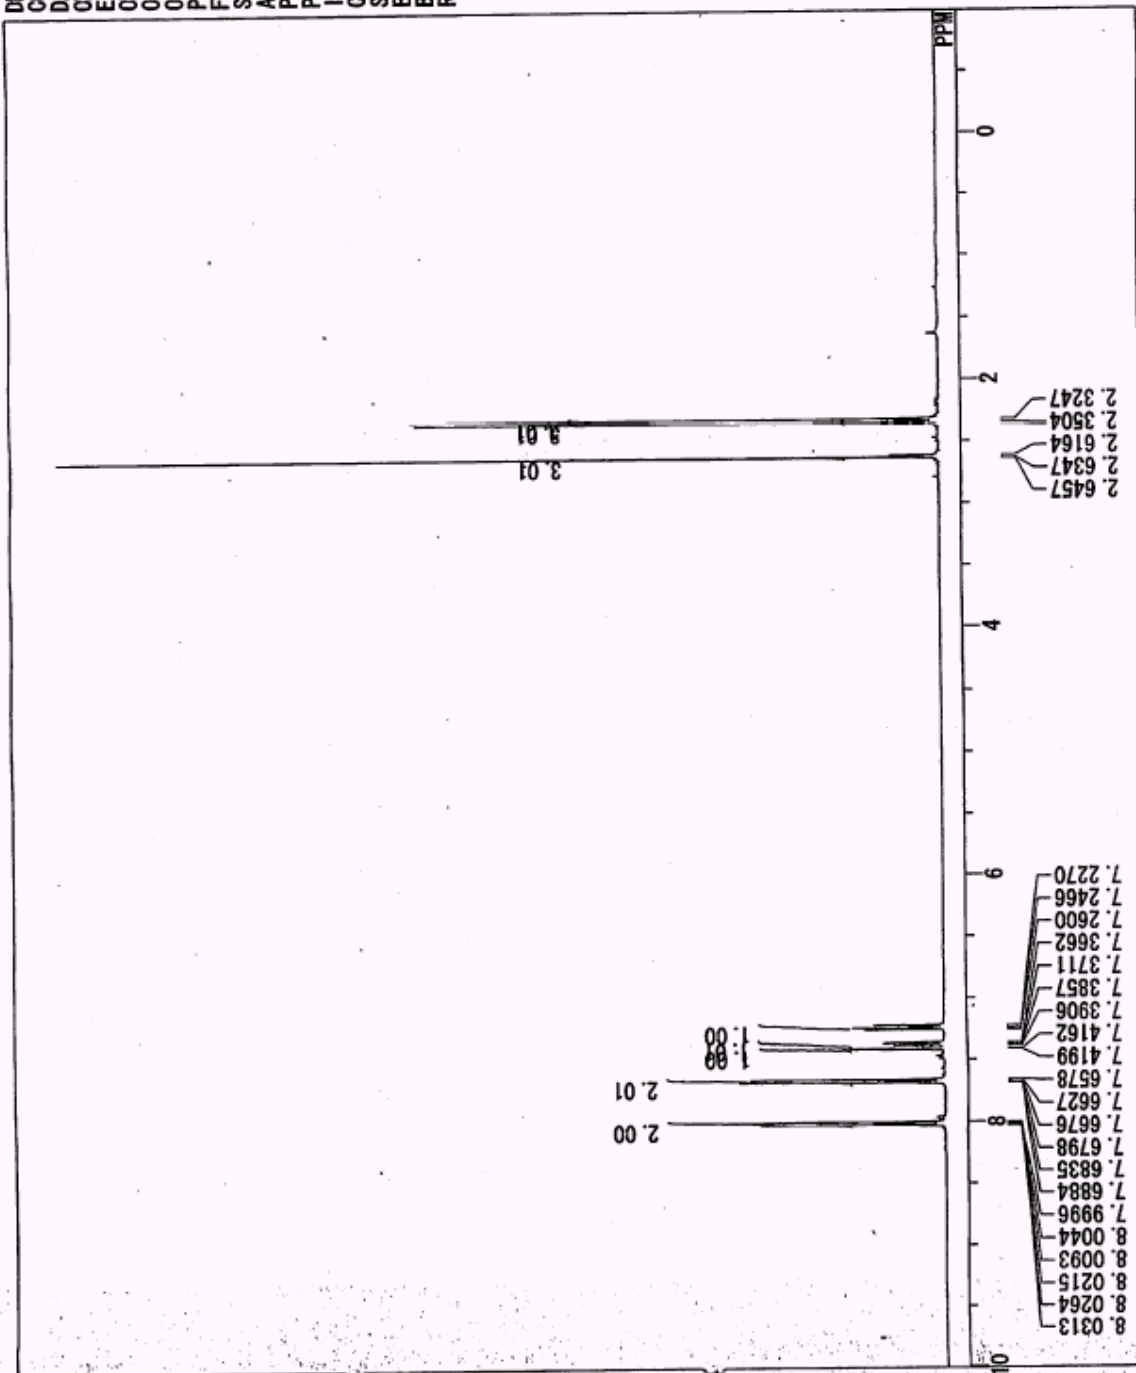

C:\NW1\InLambda\COMMONW\_DEFAULT.AL

DF ILE  
COMNT  
DATIM  
OBNUC  
EXMOD  
OBFRQ  
OBSET  
OBFIN  
POINT  
FREQU  
SCANS  
ACQTH  
PD  
PHI  
IRNUC  
CTEMP  
SLVNT  
EXREF  
BF  
RGAIN

Thu Feb 09 10:51:17 2006  
13C  
bcm  
100.40 MHz  
0.00 KHz  
135500.00 Hz  
32768  
27100.27 Hz  
300  
1.2091 sec  
1.7909 sec  
4.50 usec  
26.0 c  
CDCL3  
77.00 ppm  
0.12 Hz  
30

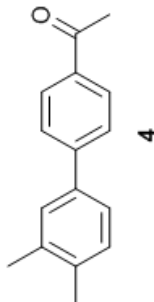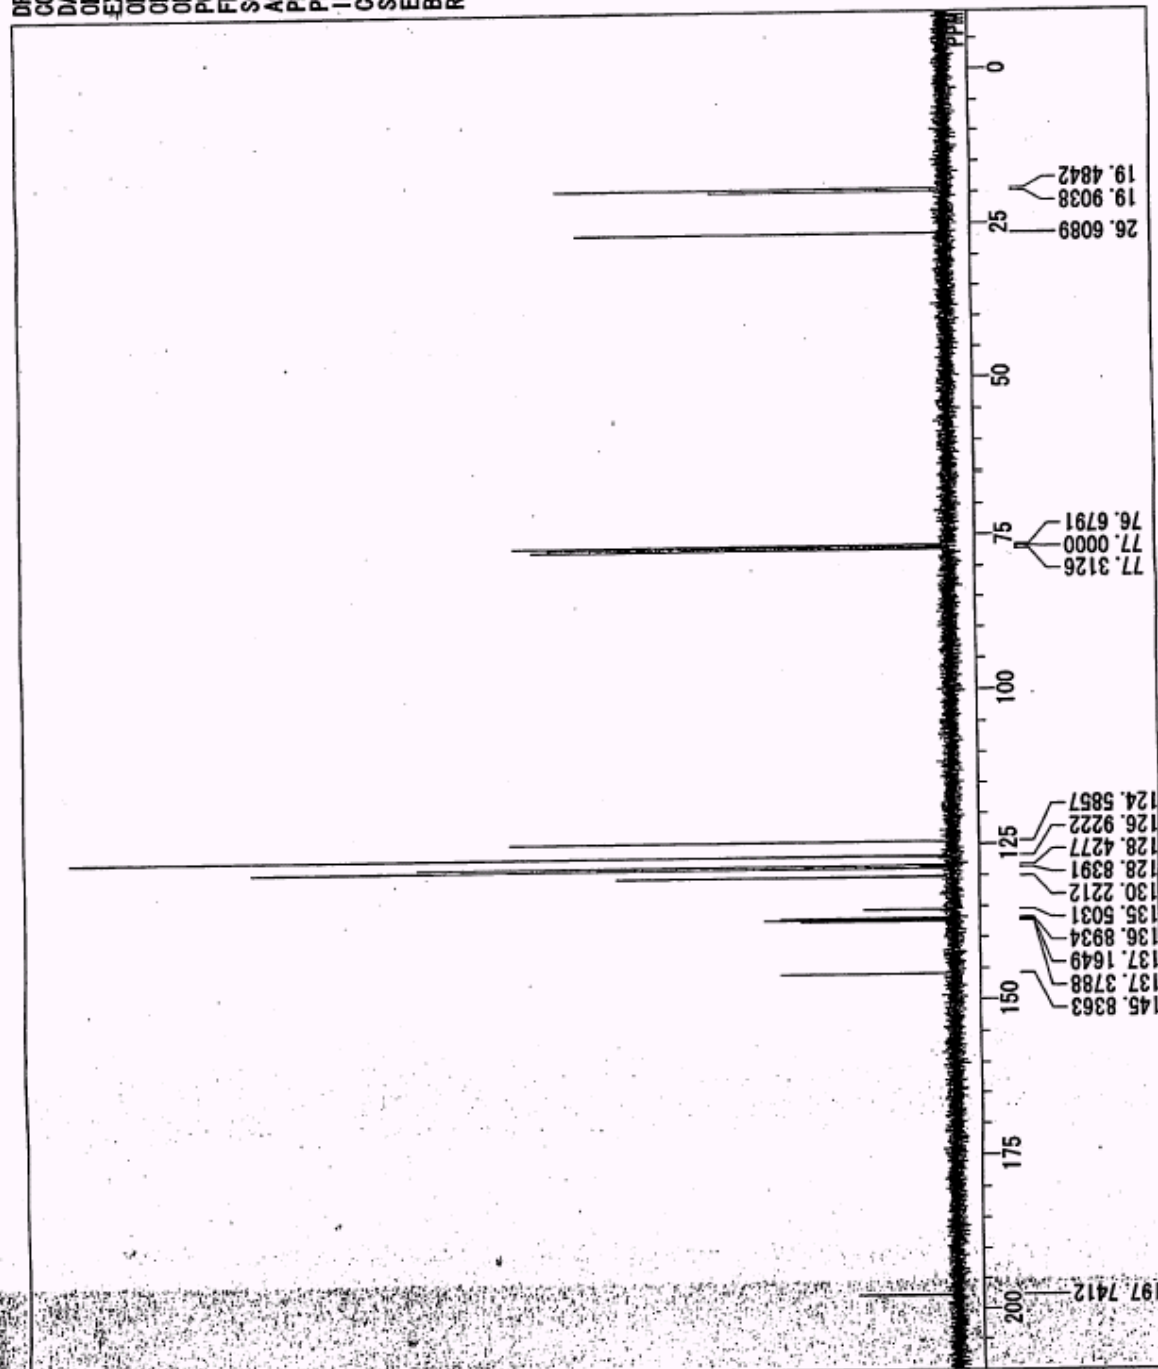

Supplement: c3ob41623b.pdf [file c3ob41623b.pdf]
